# Supplementary material for: A trans-palladium dichloride complex with a bulky organosulfur ligand: syntheses, structure, and applications in catalytic alkylation of acetophenone and secondary alcohols using alcohols
Source: Royal Society of Chemistry journal article supplement (doi:10.1039/d4nj04901b), 2025-01-01
Supplement: d4nj04901b1.pdf [file d4nj04901b1.pdf]

Electronic Supplementary Information for  
**A *trans*-palladium dichloride complex with a bulky organosulfur ligand:  
syntheses, structure, and applications in catalytic alkylation of acetophenone  
and secondary alcohols using alcohols**

Gaatha K,<sup>§,a</sup> Sunil Kumar,<sup>§,a</sup> Ashutosh Sharma,<sup>a</sup> Nattamai Bhuvanesh,<sup>b</sup> Partha Roy,<sup>a</sup> and Hemant  
Joshi\*<sup>a</sup>

<sup>a</sup>ISC Laboratory, Department of Chemistry, School of Chemical Sciences and Pharmacy, Central  
University of Rajasthan, NH-8, Bandarsindri, Ajmer, Rajasthan 305817, India

<sup>b</sup>Department of Chemistry, Texas A&M University, PO Box 30012, College Station, Texas  
77842-3012, USA

## EXPERIMENTAL SECTION

**General.** The synthesis of the ligand precursor, ligand (**L1**), and palladium complex (**C1**) were performed using standard Schlenk line techniques. HPLC grade solvents, including DMF, MeOH, EtOAc, hexane, DCM, EtOH, CHCl<sub>3</sub>, Toluene and acetone, were employed in the reactions. All solvents were used as received without further purification. 1-Naphthaldehyde (Sigma Aldrich), CDCl<sub>3</sub> (Sigma Aldrich), K<sup>t</sup>OBu (Sigma Aldrich), PdCl<sub>2</sub>(CH<sub>3</sub>CN)<sub>2</sub> (Sigma Aldrich), Acetophenone (Sigma Aldrich), K<sub>2</sub>CO<sub>3</sub> (Spectrochem), NaBH<sub>4</sub> (Spectrochem), SOCl<sub>2</sub> (Spectrochem), Sulfur powder (Spectrochem), Na<sub>2</sub>SO<sub>4</sub> (Spectrochem), NaOH (Spectrochem), KOH (Spectrochem), Benzyl alcohol (Spectrochem), 3-bromoacetophenone (Molychem), 3-methoxy acetophenone (Molychem), para methoxy benzyl alcohol (Molychem), and para methyl benzyl alcohol (Molychem) were used as received. The <sup>1</sup>H and <sup>13</sup>C{<sup>1</sup>H} NMR spectra of the compounds were recorded at ambient temperature using a Bruker 500 MHz instrument. The NMR solvent peaks were referenced as follows (δ, ppm): <sup>1</sup>H, CHCl<sub>3</sub> (7.26); <sup>13</sup>C{<sup>1</sup>H}, CDCl<sub>3</sub> (77.00). The melting point was determined using a Buchi Melting Point B-540 instrument. Infrared spectra were recorded in the 4000–400 cm<sup>-1</sup> region at room temperature using a PerkinElmer FTIR spectrometer. High-resolution mass spectrometry (HRMS) data were obtained with an Agilent Q-TOF LC-MS spectrometer using the electrospray ionization (ESI) method. The reaction progress was monitored by TLC, utilizing 0.25 mm silica gel 60-F254 plates and a UV chamber equipped with 254 nm and 395 nm lamps.

### Crystallography:

A suitable yellow block-shaped crystal of **L1**, along with colorless plate-shaped crystals of **C1**, were selected using a polarizing microscope. These crystals were carefully mounted on a nylon loop using paraffin oil and placed in a cold nitrogen stream maintained at a low temperature of 110.00 K with the help of an Oxford Cryo-system. Crystal screening, unit cell determination, and data collection were conducted on a Bruker Venture diffractometer equipped with a PHOTON III detector.<sup>s1</sup> The diffraction pattern of the crystals was indexed, and strategy calculations from the APEX 3 software (Bruker, 2018) were used to determine the number of runs and images needed for data collection. The process involved φ and ω scans utilizing CuKα radiation, which extended to a maximum resolution of Θ = 70.115° (corresponding to a wavelength of 0.82 Å).<sup>s2</sup> The unit cell parameters were refined using SAINT V8.38A software (Bruker, 2018), based on 9936 reflections,<sup>s3</sup> which represented 33% of the observed reflections. The crystal structure solution and

final refinement parameters for the compound **C1** are detailed in Table s1, along with data for L1.<sup>S4</sup> Additionally, selected bond distances and angles are presented in Table s2, providing important structural insights into the molecular arrangement of these compounds.

**Table s1.** Summary of crystallographic data.

|                                                                | <b>L1</b>                         | <b>C1</b>                                                        |
|----------------------------------------------------------------|-----------------------------------|------------------------------------------------------------------|
| empirical formula                                              | C <sub>22</sub> H <sub>18</sub> S | C <sub>44</sub> H <sub>36</sub> Cl <sub>2</sub> PdS <sub>2</sub> |
| formula weight                                                 | 314.42                            | 806.15                                                           |
| temperature [K]                                                | 110.0                             | 110.00                                                           |
| Diffractometer                                                 | Bruker APEX-II                    | Bruker Venture<br>(PHOTON III)                                   |
| wavelength [Å]                                                 | 0.71073                           | 1.54178                                                          |
| crystal system                                                 | orthorhombic                      | Monoclinic                                                       |
| space group                                                    | <i>Ibca</i>                       | <i>C2/c</i>                                                      |
| unit cell dimensions:                                          |                                   |                                                                  |
| <i>a</i> [Å]                                                   | 7.7139(5)                         | 21.9194(7)                                                       |
| <i>b</i> [Å]                                                   | 15.7197(9)                        | 6.1161(2)                                                        |
| <i>c</i> [Å]                                                   | 26.6782(16)                       | 26.6465(9)                                                       |
| $\alpha$ [°]                                                   | 90.00                             | 90                                                               |
| $\beta$ [°]                                                    | 90.00                             | 90.928(2)                                                        |
| $\gamma$ [°]                                                   | 90.00                             | 90                                                               |
| <i>V</i> [Å <sup>3</sup> ]                                     | 3235.0(3)                         | 3571.8(2)                                                        |
| <i>Z</i>                                                       | 8                                 | 4                                                                |
| $\rho_{\text{calc}}$ [Mg/m <sup>3</sup> ]                      | 1.291                             | 1.499                                                            |
| $\mu$ [mm <sup>-1</sup> ]                                      | 0.197                             | 6.898                                                            |
| F(000)                                                         | 1328                              | 1648                                                             |
| crystal size [mm <sup>3</sup> ]                                | 0.48×0.45×0.39                    | 0.36×0.13×0.01                                                   |
| $\theta$ limit[°]                                              | 2.591 to 30.593                   | 3.317 to 70.115                                                  |
| index range ( <i>h, k, l</i> )                                 | -11, 10, -22, 22, -38, 37         | -26, 26, -7, 7, -32, 32                                          |
| reflections collected                                          | 26735                             | 30433                                                            |
| independent reflections                                        | 9951                              | 9936                                                             |
| <i>R</i> (int)                                                 | 0.0445                            | 0.0247                                                           |
| max. and min. transmission                                     | 0.928 and 0.911                   | 0.910 and 0.189                                                  |
| data/restraints/parameters                                     | 2493/0/ 105                       | 3400/0/ 223                                                      |
| goodness-of-fit on <i>F</i> <sup>2</sup>                       | 1.030                             | 1.065                                                            |
| <i>R</i> indices (final) [ <i>I</i> > 2 $\sigma$ ( <i>I</i> )] |                                   |                                                                  |
| <i>R</i> <sub>1</sub>                                          | 0.0445                            | 0.0247                                                           |
| <i>wR</i> <sub>1</sub>                                         | 0.1107                            | 0.0672                                                           |
| <i>R</i> indices (all data)                                    |                                   |                                                                  |
| <i>R</i> <sub>1</sub>                                          | 0.0608                            | 0.0251                                                           |
| <i>wR</i> <sub>2</sub>                                         | 0.1202                            | 0.0676                                                           |
| largest diff. peak and hole<br>[eÅ <sup>-3</sup> ]             | 0.389 and -0.272                  | 0.363 and -0.459                                                 |

**Table s2.** Key crystallographic distances [ $\text{\AA}$ ] and angles [ $^{\circ}$ ].

| <b>C1</b>         |                                         |
|-------------------|-----------------------------------------|
| <b>Bond</b>       | <b>Length (<math>\text{\AA}</math>)</b> |
| Pd(1)—S(1)        | 2.3127(4)                               |
| Pd(1)—S(2)        | 2.3128(4)                               |
| Pd(1)—Cl(1)       | 2.2930(4)                               |
| Pd(1)—Cl(2)       | 2.2931(4)                               |
| S(1)—Cl(1)        | 1.8363(19)                              |
| S(2)—Cl(2)        | 1.8294(18)                              |
| <b>C1</b>         |                                         |
| <b>Bond</b>       | <b>Angle (deg.)</b>                     |
| S(2)—Pd(1)—S(1)   | 180.0                                   |
| Cl(1)—Pd(1)—S(2)  | 82.975(15)                              |
| Cl(2)—Pd(1)—S(2)  | 97.025(15)                              |
| Cl(1)—Pd(1)—S(1)  | 97.026(15)                              |
| Cl(2)—Pd(1)—S(1)  | 82.974(15)                              |
| Cl(1)—Pd(1)—Cl(2) | 180.0                                   |

## Copies of spectral data

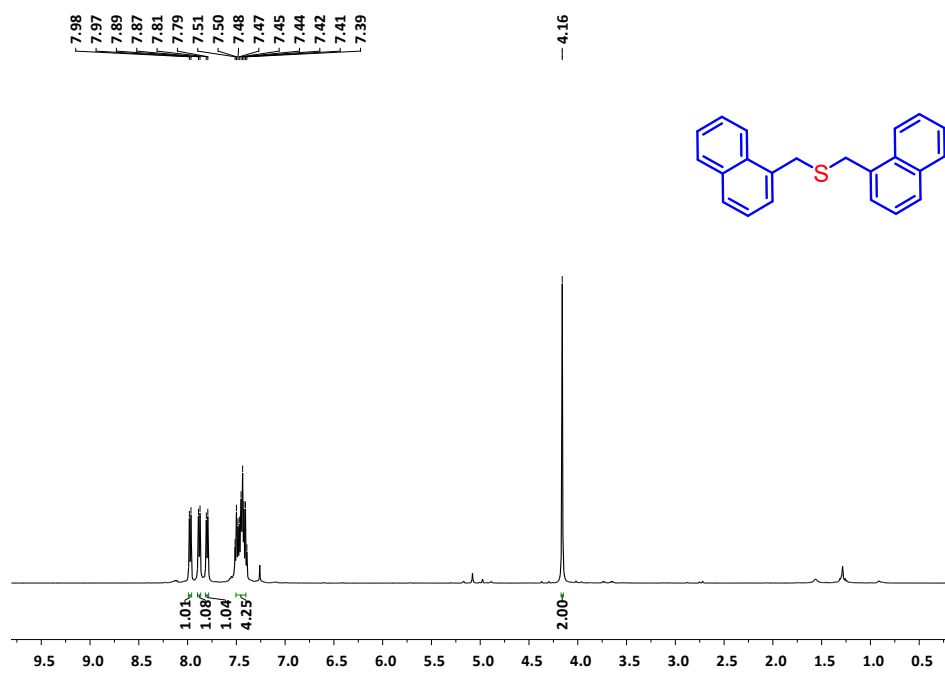

Figure s1. <sup>1</sup>H NMR spectrum of L1.

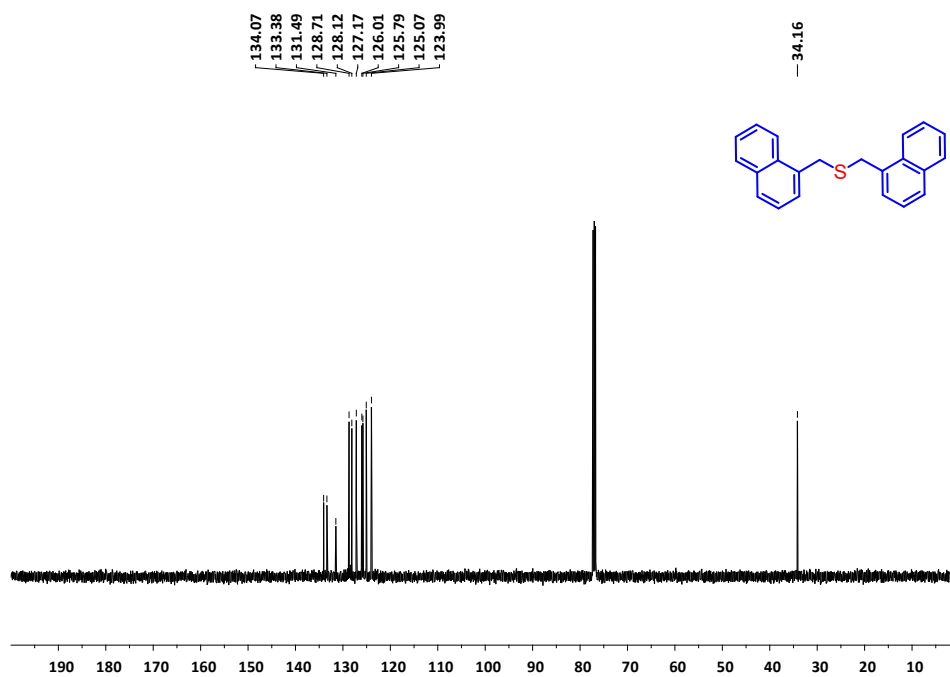

Figure s2. <sup>13</sup>C{<sup>1</sup>H} NMR spectrum of L1.

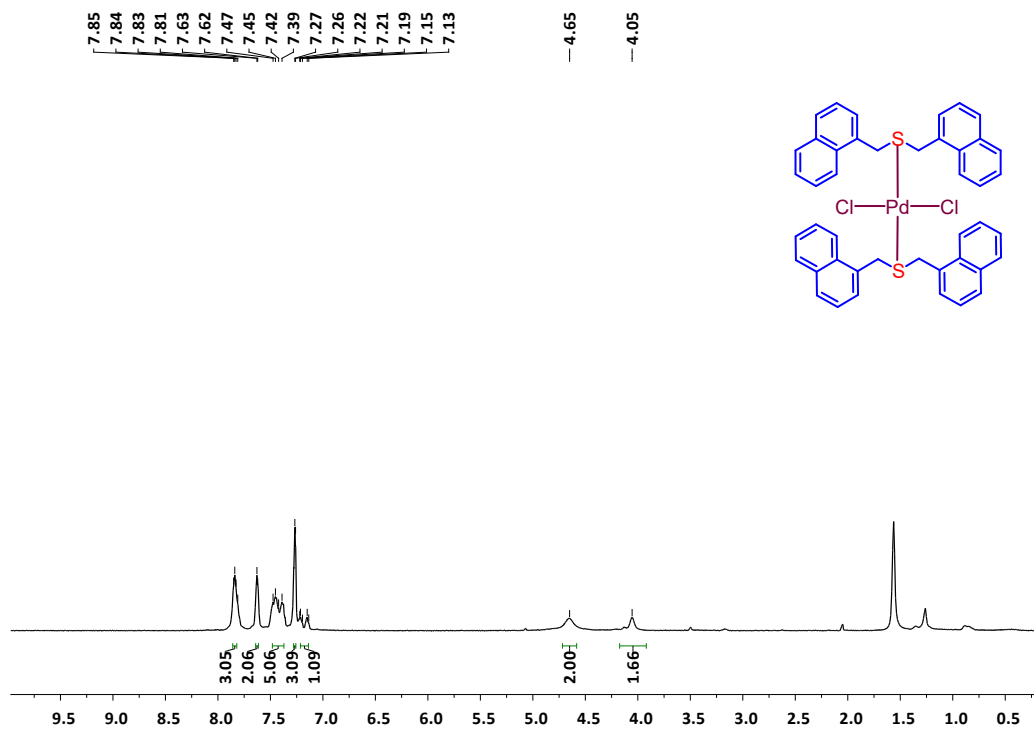

Figure s3.  $^1\text{H}$  NMR spectrum of C1.

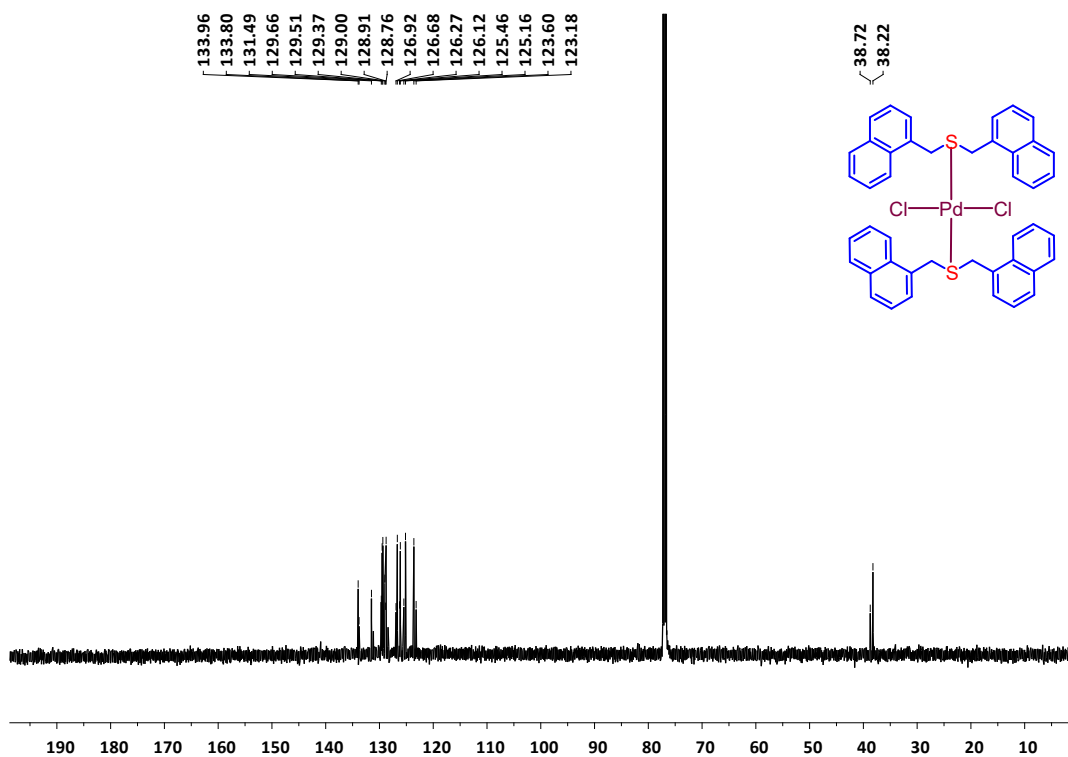

Figure s4.  $^{13}\text{C}\{^1\text{H}\}$  NMR spectrum of C1.

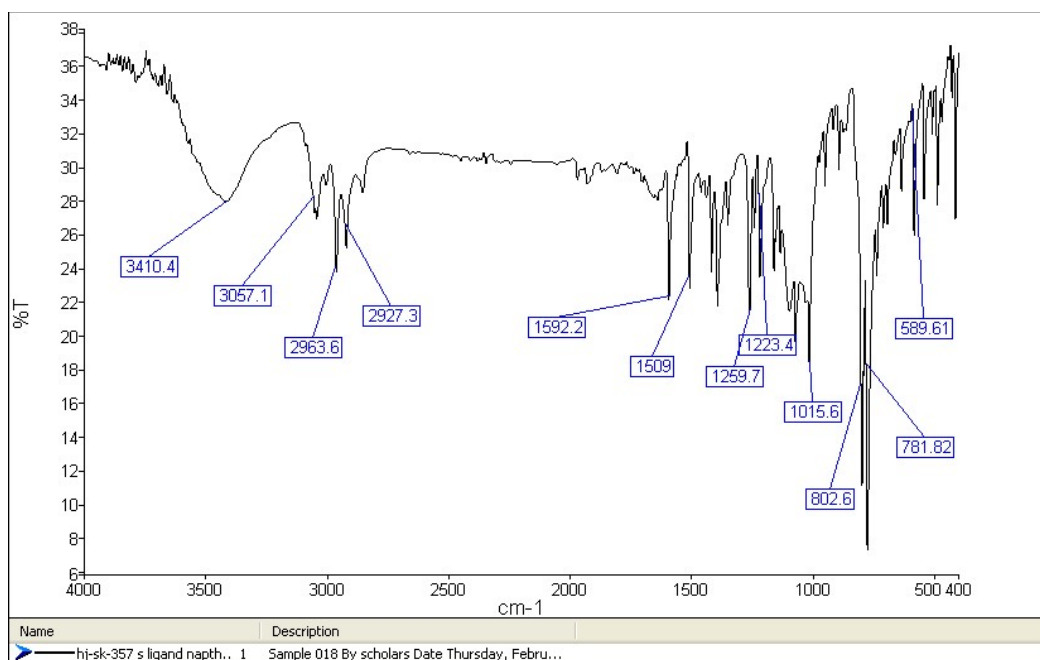

**Figure s5.** FTIR spectrum of L1.

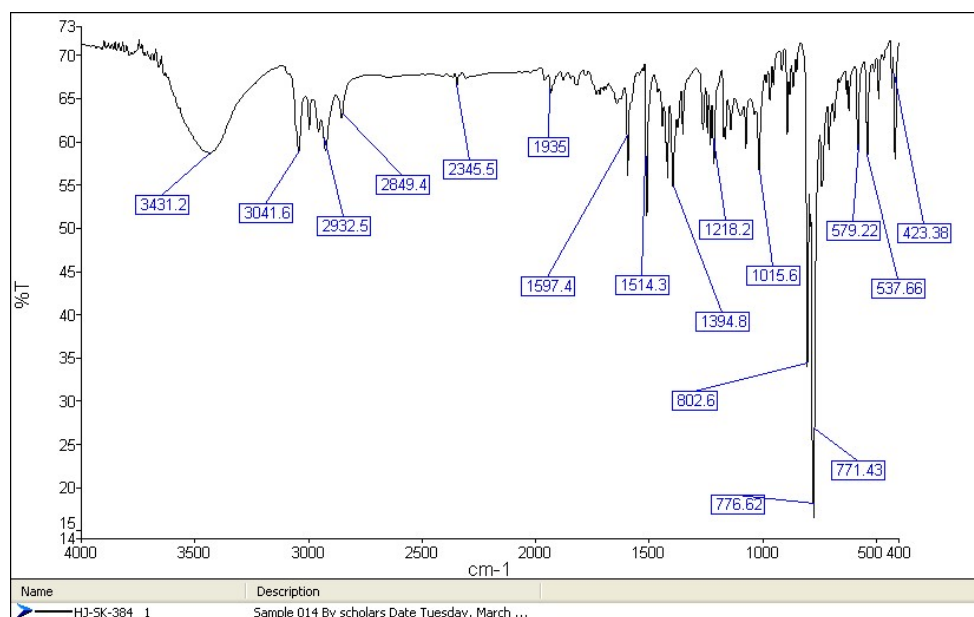

**Figure s6.** FTIR spectrum of C1.

Compound Spectra

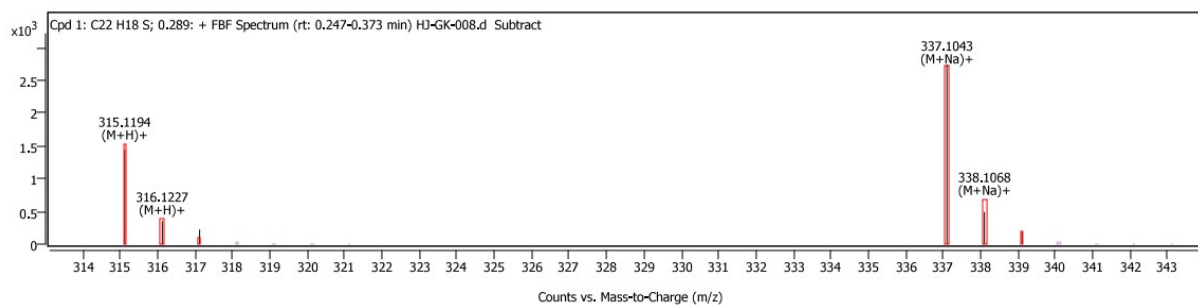

Figure s7. HRMS of L1.

Compound Spectra

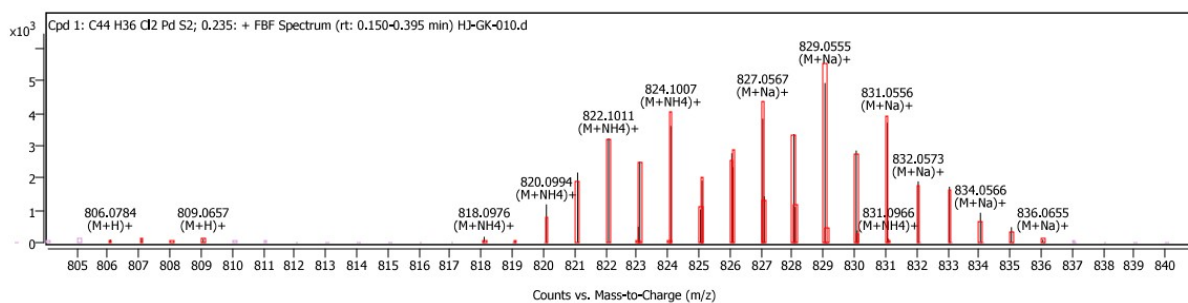

Figure s8. HRMS of C1.

Spectroscopic Data of Products ( $^1\text{H}$  NMR and  $^{13}\text{C}\{^1\text{H}\}$ ):

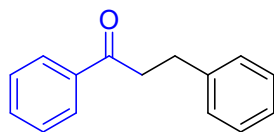

**1,3-diphenylpropan-1-one (3aa)**<sup>s5, s6</sup> Yellow liquid, 89%, NMR ( $\text{CDCl}_3$ ,  $\delta/\text{ppm}$ ):  $^1\text{H}$  (500 MHz): 7.98 (d,  $J = 7$  Hz, 2H), 7.57 (t,  $J = 7.5$  Hz, 1H), 7.47 (t,  $J = 8$  Hz, 2H), 7.22 – 7.35 (m, 5H), 3.33 (t,  $J = 7$  Hz, 2H), 3.10 (t,  $J = 8$  Hz, 2H),  $^{13}\text{C}\{^1\text{H}\}$  NMR (125 MHz,  $\text{CDCl}_3$ )  $\delta$ : 199.1 (s), 141.2 (s), 136.8 (s), 132.9 (s), 128.5 (s), 128.4 (s), 128.3 (s), 127.9 (s), 126.0 (s), 40.3 (s), 30.0 (s).

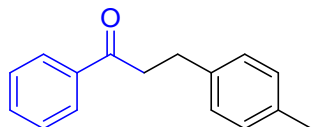

**1-phenyl-3-(p-tolyl)propan-1-one (3ab)**<sup>s5, s6</sup> Yellow liquid, 73%, NMR ( $\text{CDCl}_3$ ,  $\delta/\text{ppm}$ ):  $^1\text{H}$  (500 MHz): 7.98 (d,  $J = 7.5$  Hz, 2H), 7.57 (t,  $J = 7.5$  Hz, 1H), 7.47 (t,  $J = 7.5$  Hz, 2H), 7.16 (dd,  $J = 19.7, 7.8$  Hz, 4H), 3.31 (t,  $J = 8$  Hz, 2H), 3.06 (t,  $J = 9$  Hz, 2H), 2.35 (s, 3H),  $^{13}\text{C}\{^1\text{H}\}$  NMR (125 MHz,  $\text{CDCl}_3$ )  $\delta$ : 199.2 (s), 138.1 (s), 136.8 (s), 135.5 (s), 132.9 (s), 129.6 (s), 129.3 (s), 129.1 (s), 128.5 (s), 128.2 (s), 128.0, 40.5 (s), 29.7 (s), 20.9 (s).



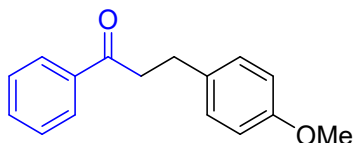

**3-(4-methoxyphenyl)-1-phenylpropan-1-one (3ac)**<sup>s5, s6</sup> Yellow liquid, 65%, **NMR** (CDCl<sub>3</sub>, δ/ppm): <sup>1</sup>H (500 MHz): 7.88 (d, *J* = 8 Hz, 1H), 7.48 (t, *J* = 7.5 Hz, 1H), 7.38 (t, *J* = 7 Hz, 2H), 7.19 (s, 1H), 7.10 (d, *J* = 8.5 Hz, 2H), 6.77 (d, *J* = 8.5 Hz, 2H), 3.71 (s, 3H), 3.20 (t, *J* = 8 Hz, 2H), 2.94 (t, *J* = 7 Hz, 2H), <sup>13</sup>C{<sup>1</sup>H} **NMR** (125 MHz, CDCl<sub>3</sub>) δ: 199.4 (s), 157.8 (s), 136.9 (s), 133.3 (s), 133.0 (s), 129.3 (s), 128.6 (s), 127.9 (s), 113.9 (s), 55.3 (s), 40.7 (s), 29.3 (s).

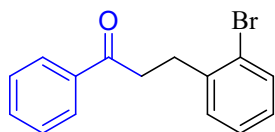

**3-(2-bromophenyl)-1-phenylpropan-1-one (3ad)**<sup>s5</sup> Yellow liquid, 76%, **NMR** (CDCl<sub>3</sub>, δ/ppm): <sup>1</sup>H (500 MHz): 7.98 (d, *J* = 7.5 Hz, 2H), 7.56 (t, *J* = 8.5 Hz, 2H), 7.46 (t, *J* = 7 Hz, 2H), 7.32 (d, *J* = 7.6 Hz, 1H), 7.24 (dd, *J* = 7.5, 1.1 Hz, 1H), 7.07-7.10 (m, 1H), 3.32 (t, *J* = 7.5 Hz, 2H), 3.19 (t, *J* = 8 Hz, 2H), <sup>13</sup>C{<sup>1</sup>H} **NMR** (125 MHz, CDCl<sub>3</sub>) δ: 198.9 (s), 140.5 (s), 136.7 (s), 133.1 (s), 132.9 (s), 130.8 (s), 128.6 (s), 128.0 (s), 127.9 (s), 127.6 (s), 124.3 (s), 38.6 (s), 30.8 (s).

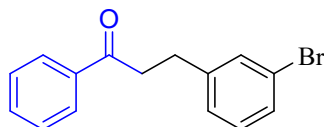

**3-(3-bromophenyl)-1-phenylpropan-1-one (3ae)**, Yellow liquid, 81%, **NMR** (CDCl<sub>3</sub>, δ/ppm): <sup>1</sup>H (500 MHz): 7.96 (d, *J* = 7 Hz, 2H), 7.57 (t, *J* = 7.5 Hz, 1H), 7.46 (t, *J* = 7.5 Hz, 2H), 7.41 (s, 1H), 7.33-7.35 (m, 1H), 7.14-7.20 (m, 2H), 3.29 (t, *J* = 8 Hz, 2H), 3.04 (t, *J* = 7.5 Hz, 2H), <sup>13</sup>C{<sup>1</sup>H} **NMR** (125 MHz, CDCl<sub>3</sub>) δ: 198.6 (s), 143.6 (s), 136.6 (s), 133.1 (s), 131.4 (s), 130.0 (s), 129.2 (s), 128.6 (s), 127.9 (s), 127.1 (s), 122.5 (s), 39.9 (s), 29.5 (s).

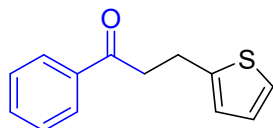

**1-phenyl-3-(thiophen-2-yl)propan-1-one (3af)**<sup>s6</sup> Yellow liquid, 77%, **NMR** (CDCl<sub>3</sub>, δ/ppm): <sup>1</sup>H (500 MHz): 7.97 (d, *J* = 7 Hz, 2H), 7.57 (t, *J* = 7.5 Hz, 1H), 7.47 (t, *J* = 7.5 Hz, 2H), 7.13 (dd, *J* = 4 Hz, *J* = 1 Hz, 1H), 6.92-6.93 (m, 1H), 6.86-6.87 (m, 1H), 3.36-3.39 (m, 2H), 3.29-3.32 (m, 2H), <sup>13</sup>C{<sup>1</sup>H} **NMR** (125 MHz, CDCl<sub>3</sub>) δ: 198.5 (s), 143.9 (s), 136.7 (s), 133.1 (s), 128.6 (s), 128.0 (s), 126.8 (s), 124.6 (s), 123.3 (s), 40.5 (s), 24.1 (s).

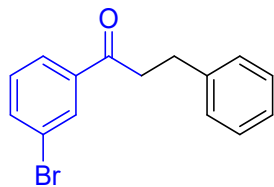

**1-(3-bromophenyl)-3-phenylpropan-1-one (3ba)**, Yellow liquid, 82%, **NMR** ( $\text{CDCl}_3$ ,  $\delta/\text{ppm}$ ):  $^1\text{H}$  (500 MHz): 8.08 (t,  $J = 1.5$  Hz, 1H), 7.87 (d,  $J = 7.8$  Hz, 1H), 7.68 (d,  $J = 8.7$  Hz, 1H), 7.35 – 7.29 (m, 3H), 7.25 – 7.22 (m, 3H). 3.28 (t,  $J = 7.6$  Hz 2H), 3.06 (t,  $J = 8$  Hz 2H),  $^{13}\text{C}\{^1\text{H}\}$  **NMR** (125 MHz,  $\text{CDCl}_3$ )  $\delta$ : 197.7 (s), 140.9 (s), 138.6 (s), 135.9 (s), 131.1 (s), 130.1 (s), 128.5 (s), 128.4 (s), 128.0 (s), 126.5 (s), 122.9 (s), 40.5 (s), 30.2 (s).

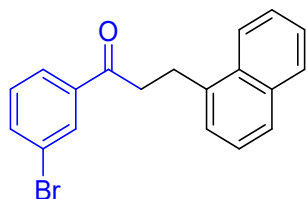

**1-(3-bromophenyl)-3-(naphthalen-1-yl)propan-1-one (3bg)**, Yellow liquid, 73%, **NMR** ( $\text{CDCl}_3$ ,  $\delta/\text{ppm}$ ):  $^1\text{H}$  (500 MHz): 8.07 (t,  $J = 1.6$  Hz, 1H), 8.03 (d,  $J = 8.3$  Hz, 1H), 7.85-7.89 (m, 2H), 7.66-7.76 (m, 2H), 7.40-7.52 (m, 4H), 7.32 (t,  $J = 7.9$  Hz, 1H), 3.53 (t,  $J = 7$  Hz, 2H), 3.40 (t,  $J = 8.5$  Hz, 2H),  $^{13}\text{C}\{^1\text{H}\}$  **NMR** (125 MHz,  $\text{CDCl}_3$ )  $\delta$ : 197.9 (s), 138.5 (s), 136.9 (s), 135.9 (s), 134.0 (s), 131.2 (s), 130.2 (s), 129.0 (s), 128.9 (s), 127.1 (s), 126.8 (s), 126.5 (s), 126.2 (s), 126.1 (s), 125.6 (s), 123.3 (s), 123.0 (s), 39.9 (s), 26.0 (s).

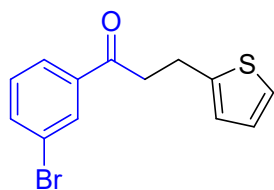

**1-(3-bromophenyl)-3-(thiophen-2-yl)propan-1-one (3bf)**, Yellow liquid, 79%, **NMR** ( $\text{CDCl}_3$ ,  $\delta/\text{ppm}$ ):  $^1\text{H}$  (500 MHz): 8.09 (t,  $J = 1.6$  Hz, 1H), 7.88 (d,  $J = 7.8$  Hz, 1H), 7.68-7.70 (m, 1H), 7.34 (t,  $J = 7.9$  Hz, 1H), 7.13 (dd,  $J = 5.1, 1.1$  Hz, 1H), 6.92 (dd,  $J = 5.1, 3.5$  Hz, 1H), 6.86 (d,  $J = 2.6$  Hz, 1H), 3.27-3.35 (m, 4H),  $^{13}\text{C}\{^1\text{H}\}$  **NMR** (125 MHz,  $\text{CDCl}_3$ )  $\delta$ : 197.2 (s), 143.4 (s), 138.6 (s), 136.0 (s), 131.1 (s), 130.2 (s), 126.9 (s), 126.5 (s), 124.8 (s), 123.5 (s), 123.1 (s), 40.6 (s), 24.0 (s).

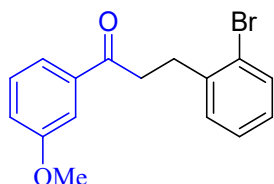

**3-(2-bromophenyl)-1-(3-methoxyphenyl)propan-1-one (3ca)**, Yellow liquid, 84%, **NMR** (CDCl<sub>3</sub>, δ/ppm): 7.70 (dd, *J* = 7.6, 1.7 Hz, 1H), 7.53 (dd, *J* = 7.9, 0.8 Hz, 1H), 7.43-7.47 (m, 1H), 7.27-7.30 (m, 1H), 7.23 (dd, *J* = 7.4, 6.7 Hz, 1H), 7.04-7.08 (m, 1H), 6.94-7.01 (m, 2H), 3.87 (s, 3H), 3.32 (t, *J* = 7.5 Hz, 2H), 3.14 (t, *J* = 7.7 Hz, 2H), **<sup>13</sup>C{<sup>1</sup>H} NMR** (125 MHz, CDCl<sub>3</sub>) δ: 201.5 (s), 140.9 (s), 133.5 (s), 132.9 (s), 130.7 (s), 130.2 (s), 128.4 (s), 128.3 (s), 127.7 (s), 127.5 (s), 124.5 (s), 120.8 (s), 111.4 (s), 55.4 (s), 43.3 (s), 30.9 (s).

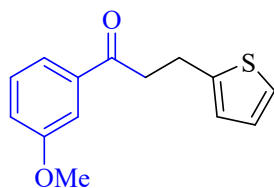

**1-(3-methoxyphenyl)-3-(thiophen-2-yl)propan-1-one (3cf)**, Yellow liquid, 76%, **NMR** (CDCl<sub>3</sub>, δ/ppm): **<sup>1</sup>H** (500 MHz): 7.54 (d, *J* = 7.5 Hz, 1H), 7.50 – 7.49 (m, 1H), 7.37 (t, *J* = 7.9 Hz, 1H), 7.10-7.13 (m, 2H), 6.92 (dd, *J* = 5.1, 3.5 Hz, 1H), 6.86 (d, *J* = 2.6 Hz, 1H), 3.85 (s, 3H), 3.34 (t, *J* = 7 Hz, 2H), 3.29 (t, *J* = 7 Hz, 2H), **<sup>13</sup>C{<sup>1</sup>H} NMR** (125 MHz, CDCl<sub>3</sub>) δ: 198.6 (s), 160.0 (s), 144.0 (s), 138.4 (s), 129.6 (s), 126.8 (s), 124.7 (s), 123.4 (s), 120.7 (s), 119.6 (s), 112.2 (s), 55.9 (s), 39.9 (s), 24.3 (s).

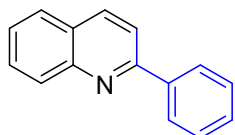

**2-phenylquinoline (6aa)**<sup>s7, s8</sup> white solid, 93%, **NMR** (CDCl<sub>3</sub>, δ/ppm): **<sup>1</sup>H** (500 MHz): 8.25 – 8.16 (m, 4H), 7.89 (d, *J* = 8.6 Hz, 1H), 7.84 (d, *J* = 8.1 Hz, 1H), 7.74 (t, *J* = 7.7 Hz, 1H), 7.54 (t, *J* = 7.5 Hz, 3H), 7.47 (t, *J* = 7.3 Hz, 1H), **<sup>13</sup>C{<sup>1</sup>H} NMR** (125 MHz, CDCl<sub>3</sub>) δ: 157.3(s), 148.1 (s), 139.5 (s), 136.9 (s), 129.7 (s), 129.6 (s), 129.4 (s), 128.8 (s), 127.6 (s), 127.4 (s), 127.2 (s), 126.3 (s), 119.0 (s).

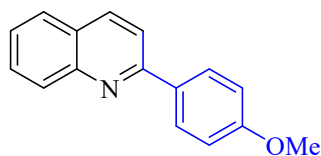

**2-(4-methoxyphenyl)quinoline (6ba)**<sup>s7, s8</sup> white solid, 89%, **NMR** (CDCl<sub>3</sub>, δ/ppm): **<sup>1</sup>H** (500 MHz): 8.19 – 8.13 (m, 4H), 7.82 (dd, *J* = 15.9, 8.4 Hz, 2H), 7.71 (t, *J* = 7.6 Hz, 1H), 7.50 (t, *J* = 7.5 Hz, 1H), 7.05 (d, *J* = 8.8 Hz, 2H), 3.89 (s, 3H), **<sup>13</sup>C{<sup>1</sup>H} NMR** (125 MHz, CDCl<sub>3</sub>) δ: 160.8 (s),

156.9 (s), 148.5 (s), 136.7 (s), 132.2 (s), 129.6 (s), 129.4 (s), 128.9 (s), 127.4 (s), 126.9 (s), 125.9 (s), 118.5 (s), 114.2 (s), 55.4 (s).

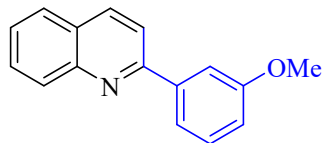

**2-(3-methoxyphenyl)quinoline (6ca)**<sup>s7, s8</sup> white solid, 87%, **NMR** (CDCl<sub>3</sub>, δ/ppm): <sup>1</sup>H (500 MHz): 8.20 (t, *J* = 7.8 Hz, 2H), 7.85 (d, *J* = 8.6 Hz, 1H), 7.83 – 7.79 (m, 2H), 7.75 – 7.71 (m, 2H), 7.53 (t, *J* = 7.0 Hz, 1H), 7.44 (t, *J* = 7.9 Hz, 1H), 7.03 (dd, *J* = 8.1, 2.1 Hz, 1H), 3.93 (s, 3H), <sup>13</sup>C{<sup>1</sup>H} **NMR** (125 MHz, CDCl<sub>3</sub>) δ: 160.0 (s), 157.0 (s), 148.1 (s), 141.0 (s), 136.7 (s), 129.7 (s), 129.6 (s), 129.5 (s), 127.4 (s), 127.1 (s), 126.2 (s), 119.9 (s), 119.0 (s), 115.3 (s), 112.6 (s), 55.3 (s).

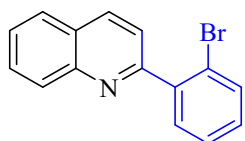

**2-(2-bromophenyl)quinoline (6da)**, white solid, 74%, **NMR** (CDCl<sub>3</sub>, δ/ppm): <sup>1</sup>H (500 MHz): 8.23 (d, *J* = 8.4 Hz, 1H), 8.18 (d, *J* = 8.4 Hz, 1H), 7.88 (d, *J* = 8.0 Hz, 1H), 7.77 – 7.74 (m, 1H), 7.71 (d, *J* = 8.1 Hz, 2H), 7.64 (d, *J* = 7.5 Hz, 1H), 7.59 (t, *J* = 7.5 Hz, 1H), 7.46 (t, *J* = 7.5 Hz, 1H), 7.31 (t, *J* = 7.0 Hz, 1H), <sup>13</sup>C{<sup>1</sup>H} **NMR** (125 MHz, CDCl<sub>3</sub>) δ: 166.5 (s), 158.7 (s), 147.9 (s), 141.6 (s), 135.7 (s), 133.3 (s), 131.6 (s), 129.9 (s), 129.7 (s), 127.7 (s), 127.6 (s), 127.1 (s), 126.8 (s), 122.7 (s), 121.9 (s).

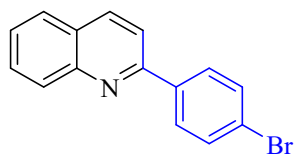

**2-(4-bromophenyl)quinoline (6ea)**<sup>s7</sup> white solid, 90 %, **NMR** (CDCl<sub>3</sub>, δ/ppm): <sup>1</sup>H (500 MHz): 8.26-8.18 (m, 2H), 8.09 – 8.05 (m, 2H), 7.86-7.83 (m, 2H), 7.78-7.74 (m, 1H), 7.69-7.65 (m, 2H), 7.59-7.53 (m, 1H), <sup>13</sup>C{<sup>1</sup>H} **NMR** (125 MHz, CDCl<sub>3</sub>) δ: 156.0 (s), 148.1 (s), 138.3 (s), 137.0 (s), 132.1 (s), 129.9 (s), 129.5 (s), 129.1 (s), 127.5 (s), 127.2 (s), 126.6 (s), 124.0 (s), 118.5 (s).

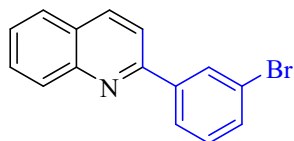

**2-(3-bromophenyl)quinoline (6fa)**<sup>s7</sup> white solid, 88%, **NMR** (CDCl<sub>3</sub>, δ/ppm): <sup>1</sup>H (500 MHz):

8.25-8.17 (m, 4H), 7.90 – 7.88 (m, 1H), 7.84 (d,  $J = 8$  Hz, 1H), 7.75-7.72 (m, 1H), 7.55-7.53 (m, 2H), 7.49-7.46 (m, 1H),  $^{13}\text{C}\{^1\text{H}\}$  NMR (125 MHz,  $\text{CDCl}_3$ )  $\delta$ : 157.3 (s), 148.2 (s), 145.8 (s), 139.6 (s), 138.3 (s), 136.8 (s), 133.8 (s), 129.7 (s), 129.3 (s), 128.8 (s), 127.6 (s), 127.4 (s), 127.2 (s), 126.3 (s), 119.0 (s).

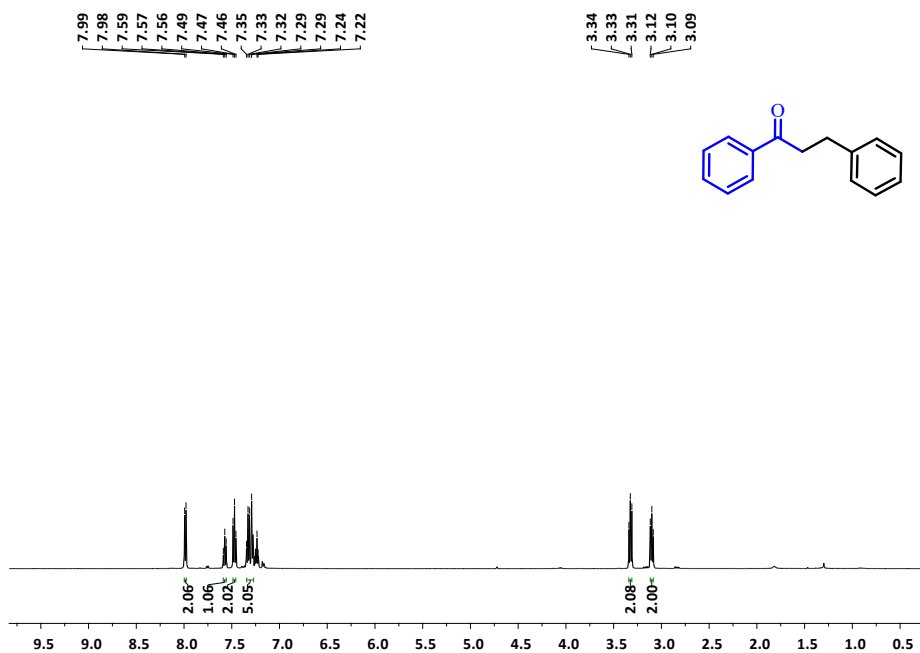

Figure s9.  $^1\text{H}$  NMR spectrum of 3aa.

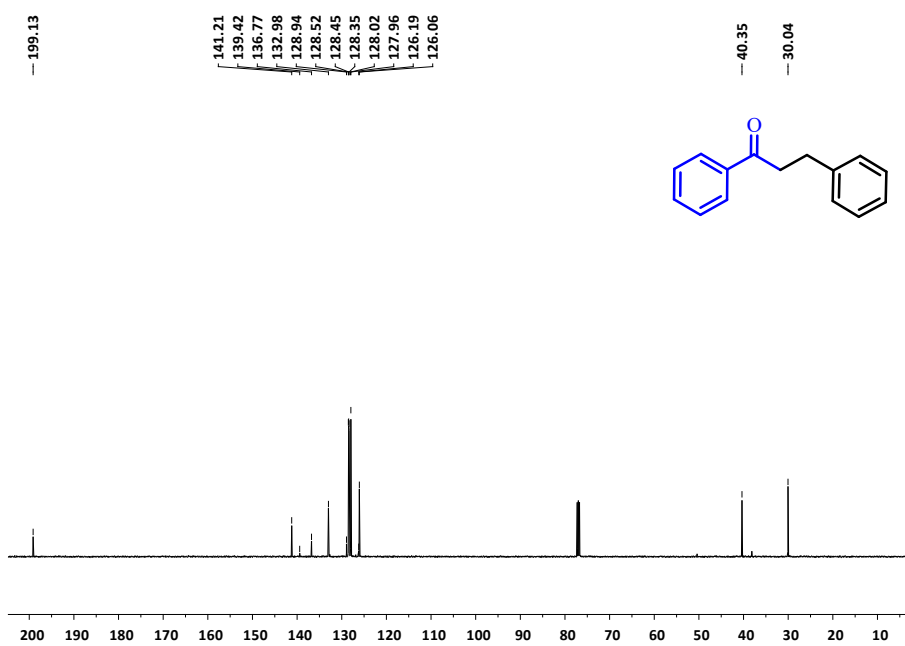

Figure s10.  $^{13}\text{C}\{^1\text{H}\}$  NMR spectrum of 3aa.

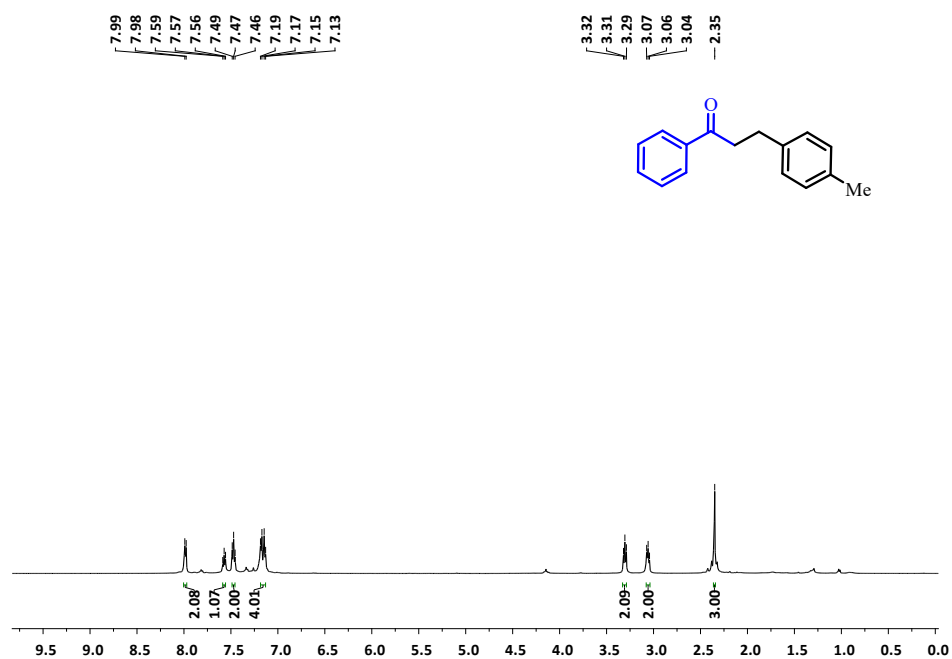

Figure s11.  $^1\text{H}$  NMR spectrum of **3ab**.

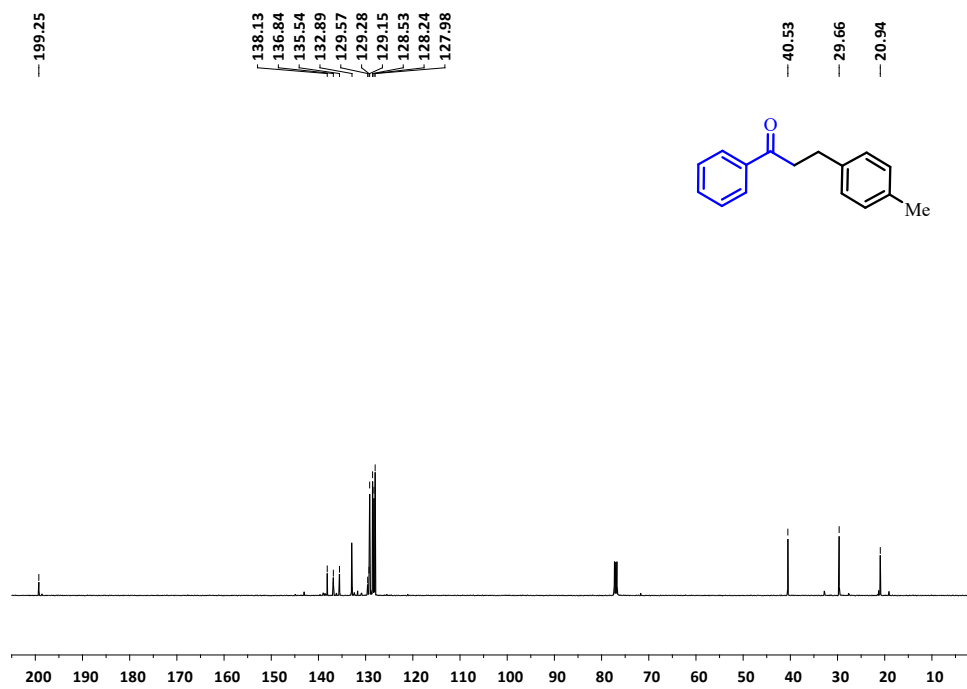

Figure s12.  $^{13}\text{C}\{^1\text{H}\}$  NMR spectrum of **3ab**.

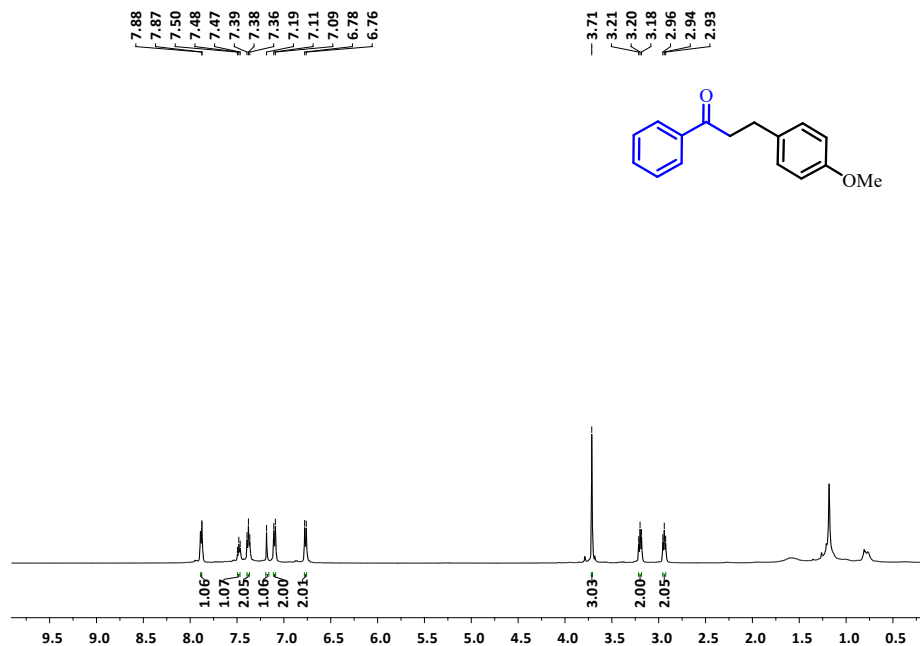

Figure s13.  $^1\text{H}$  NMR spectrum of 3ac.

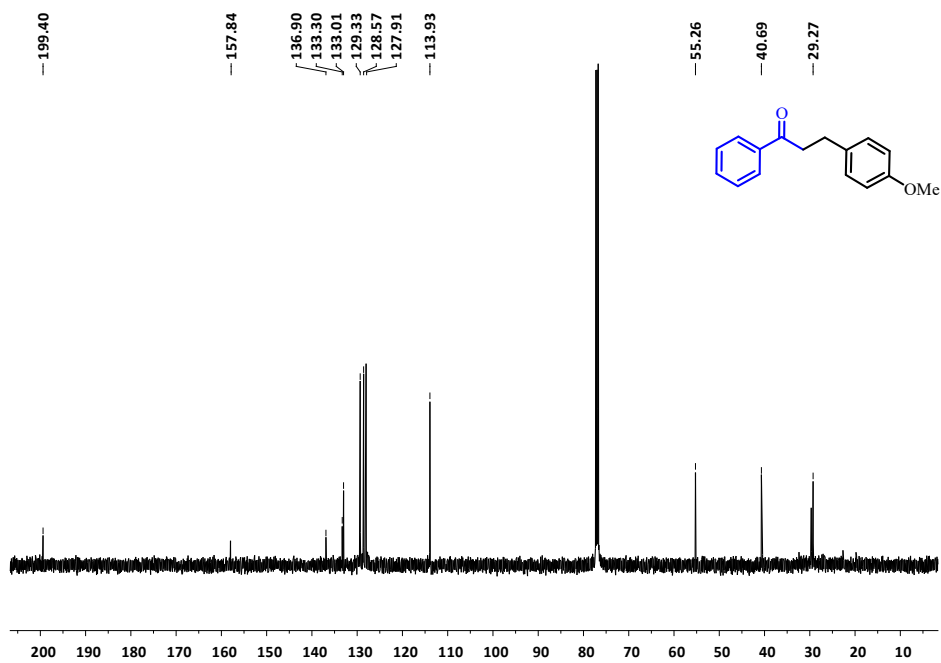

Figure s14.  $^{13}\text{C}\{^1\text{H}\}$  NMR spectrum of 3ac.

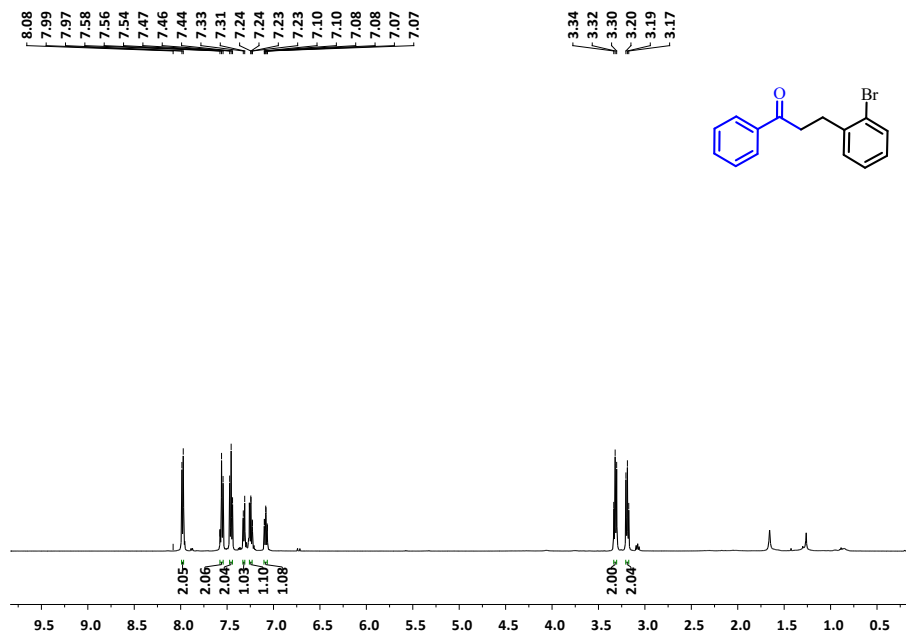

Figure s15.  $^1\text{H}$  NMR spectrum of 3ad.

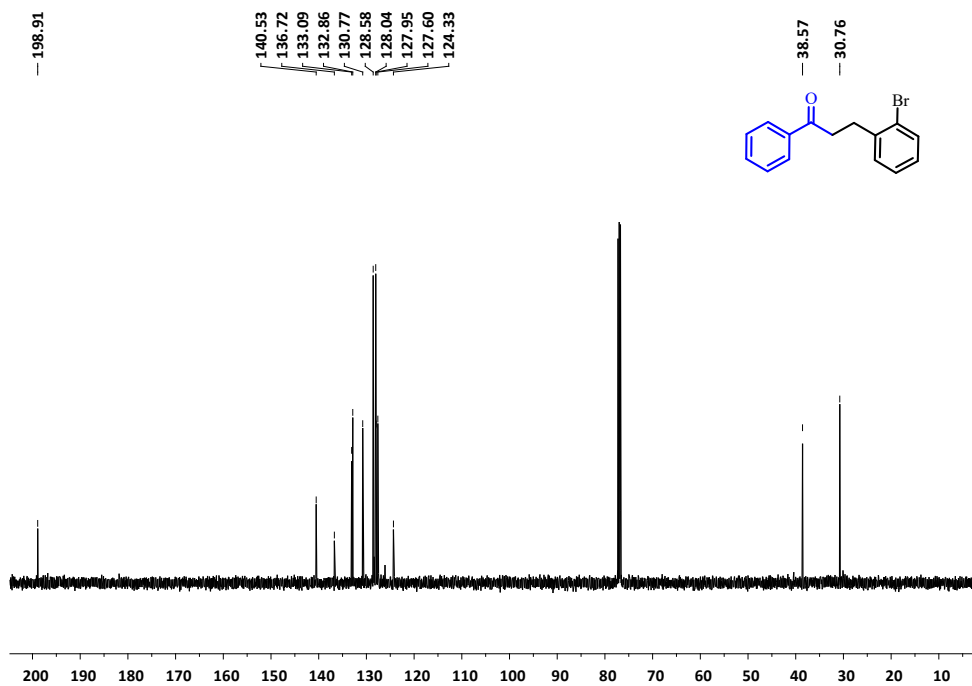

Figure s16.  $^{13}\text{C}\{^1\text{H}\}$  NMR spectrum of 3ad.



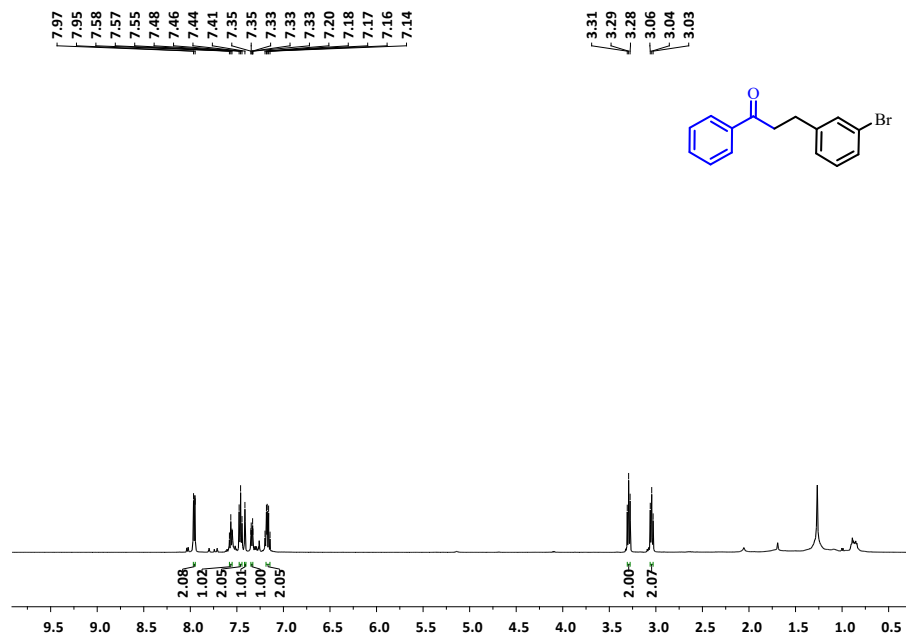

Figure s17.  $^1\text{H}$  NMR spectrum of 3ae.

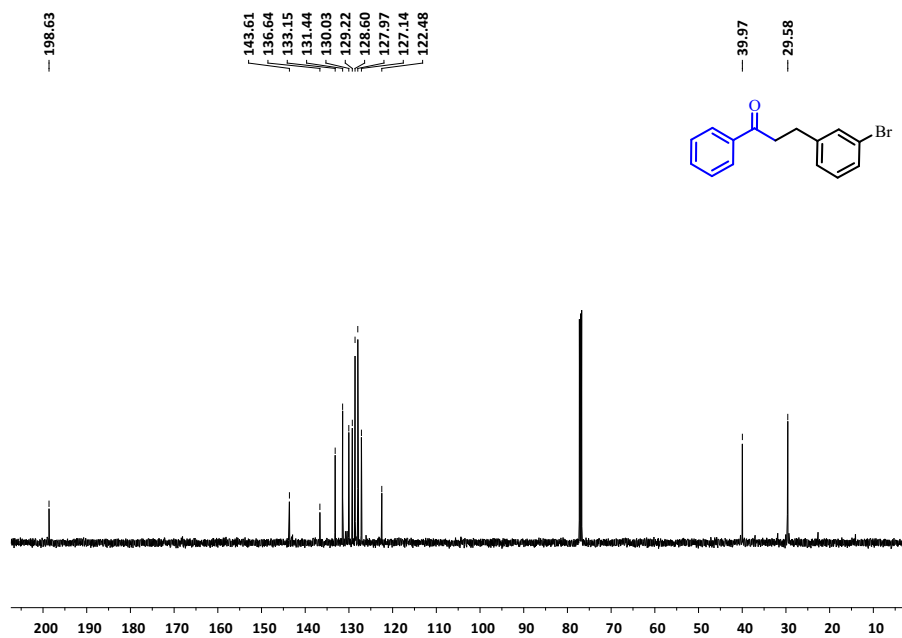

Figure s18.  $^{13}\text{C}\{^1\text{H}\}$  NMR spectrum of 3ae.

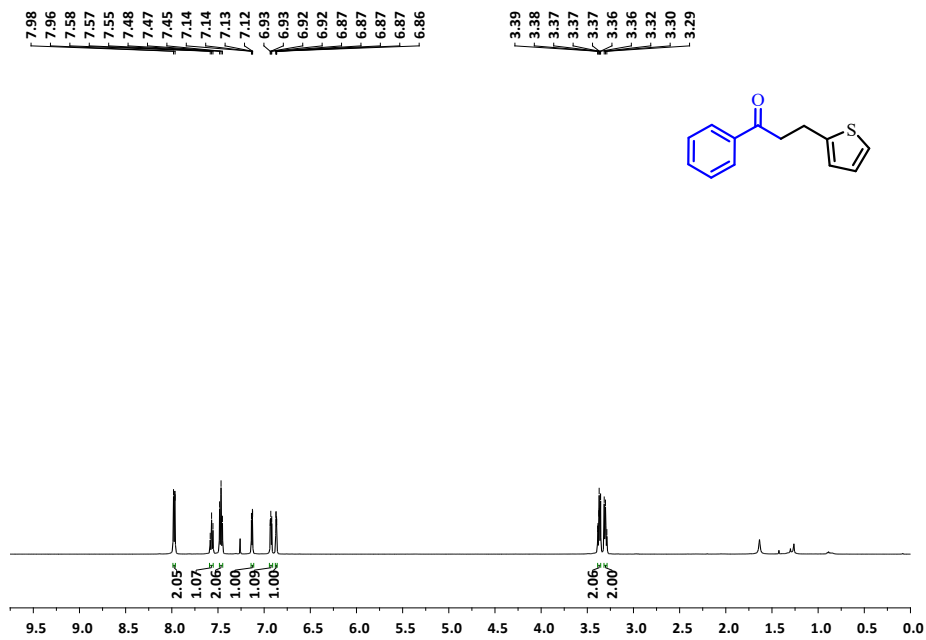

Figure s19.  $^1\text{H}$  NMR spectrum of 3af.

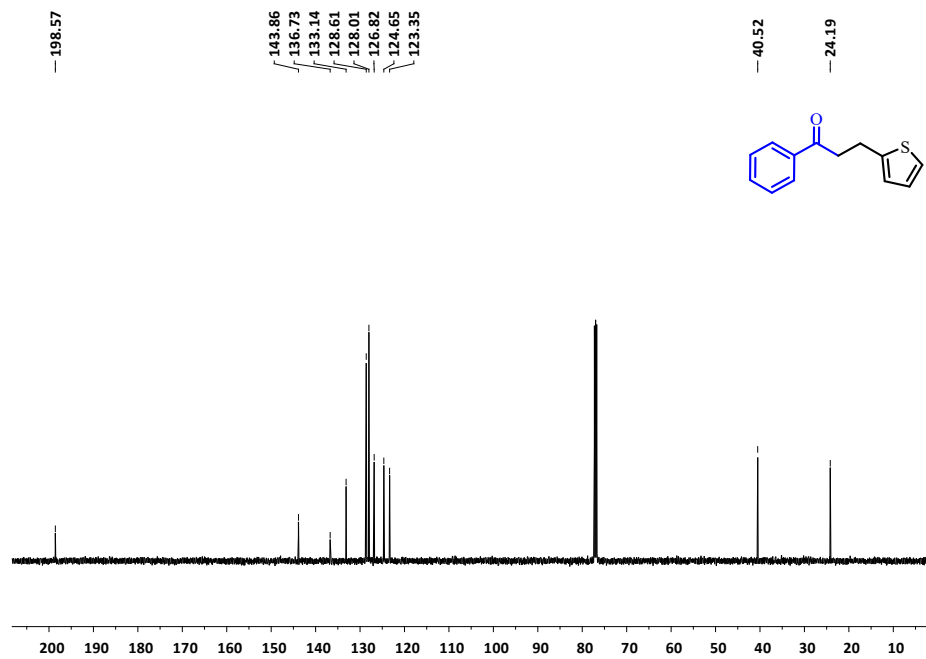

Figure s20.  $^{13}\text{C}\{^1\text{H}\}$  NMR spectrum of 3af.

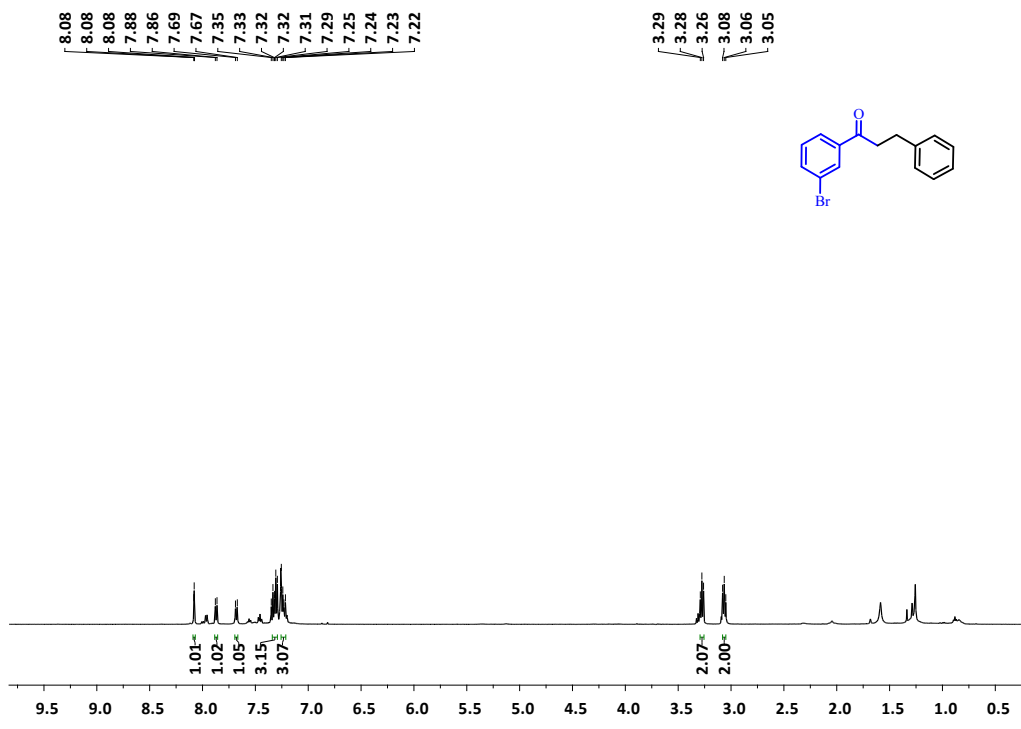

Figure s21.  $^1\text{H}$  NMR spectrum of 3ba.

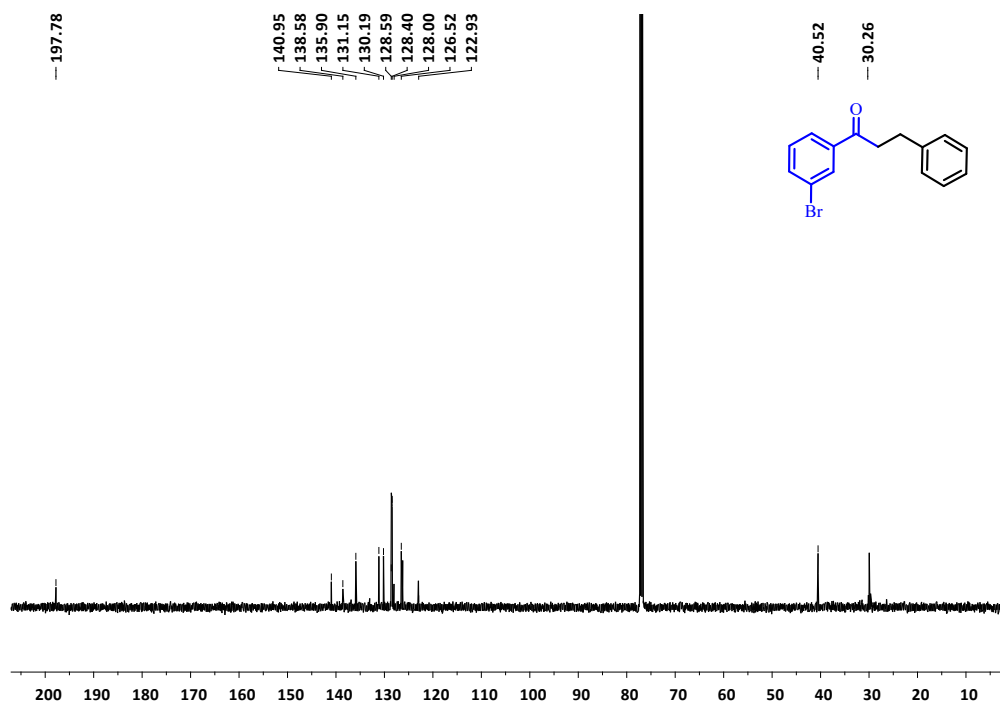

Figure s22.  $^{13}\text{C}\{^1\text{H}\}$  NMR spectrum of 3ba.

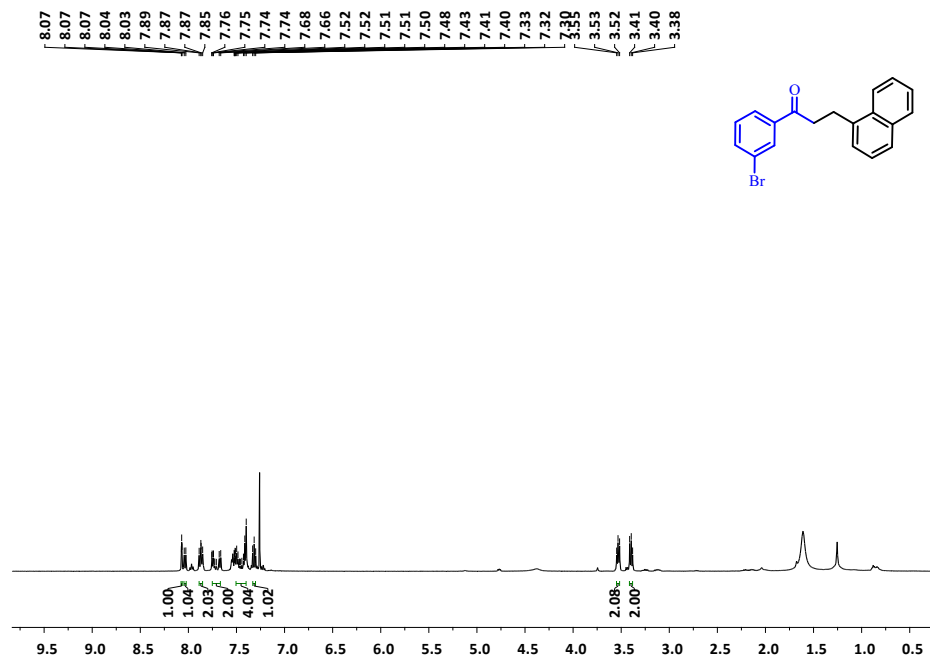

Figure s23.  $^1\text{H}$  NMR spectrum of 3bg.

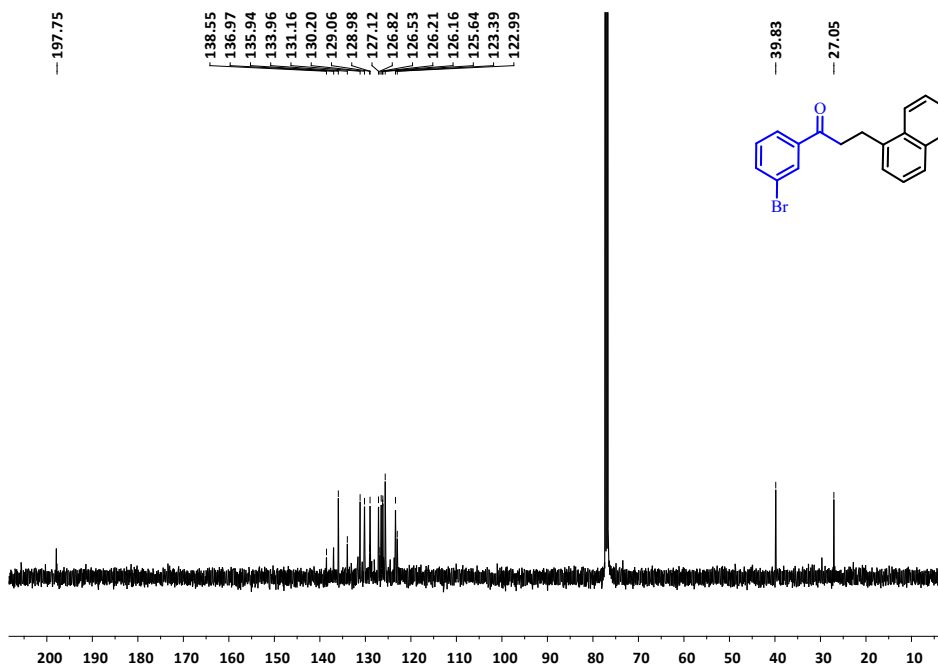

Figure s24.  $^{13}\text{C}\{^1\text{H}\}$  NMR spectrum of 3bg.

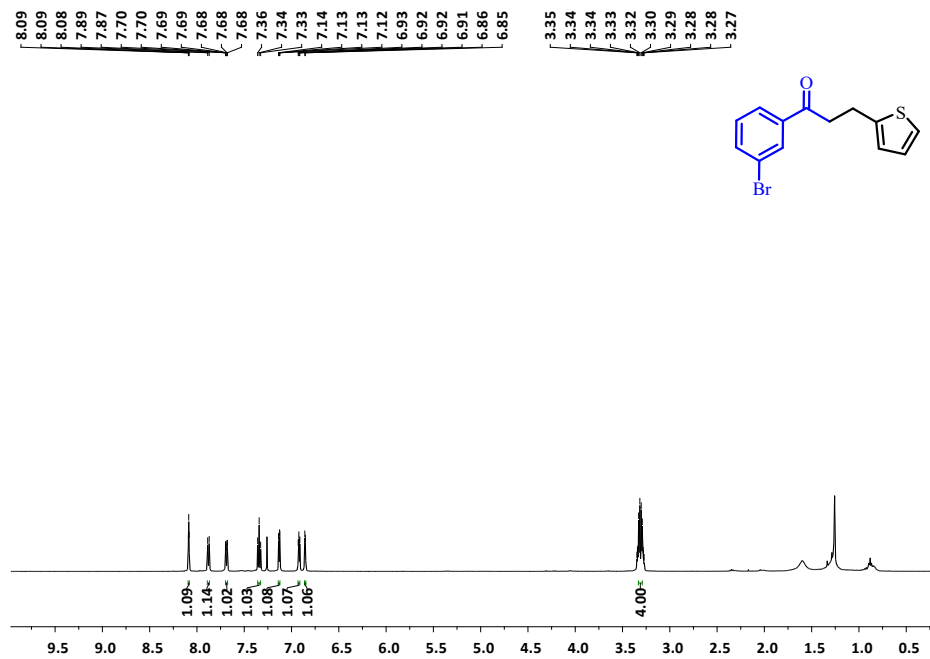

Figure s25.  $^1\text{H}$  NMR spectrum of 3bf.

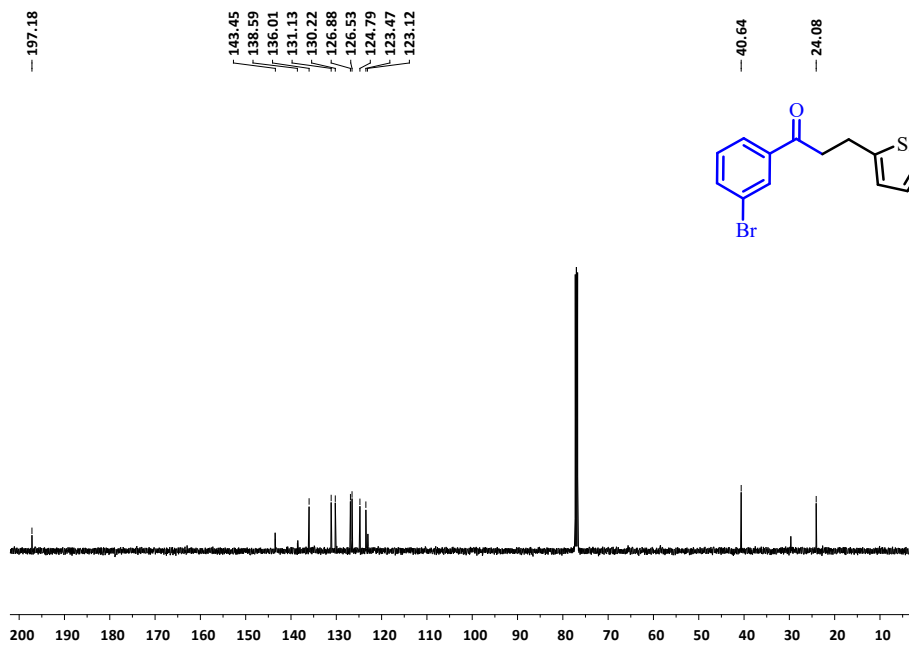

Figure s26.  $^{13}\text{C}\{^1\text{H}\}$  NMR spectrum of 3bf.

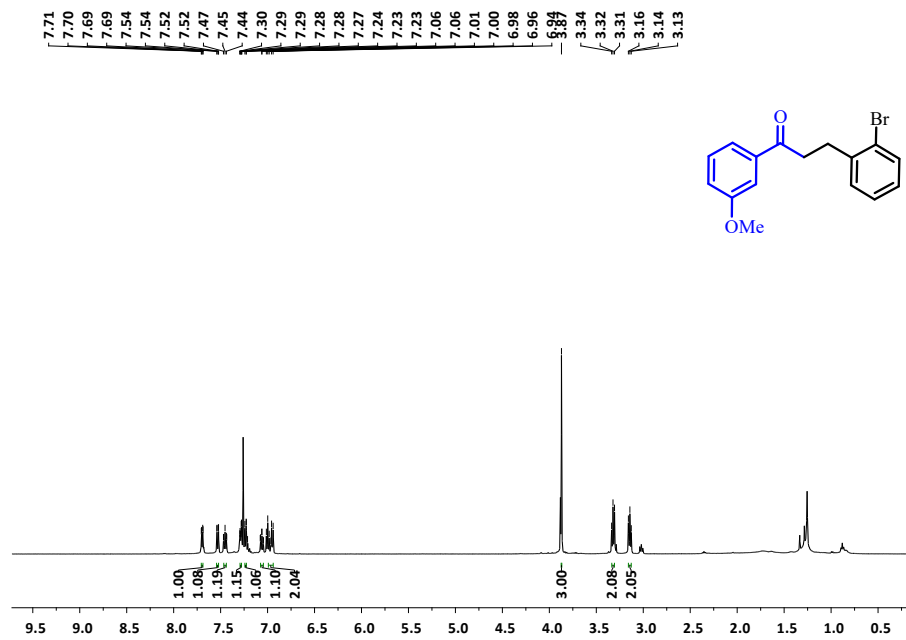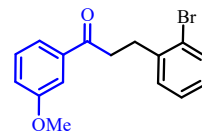

Figure s27.  $^1\text{H}$  NMR spectrum of 3ca.

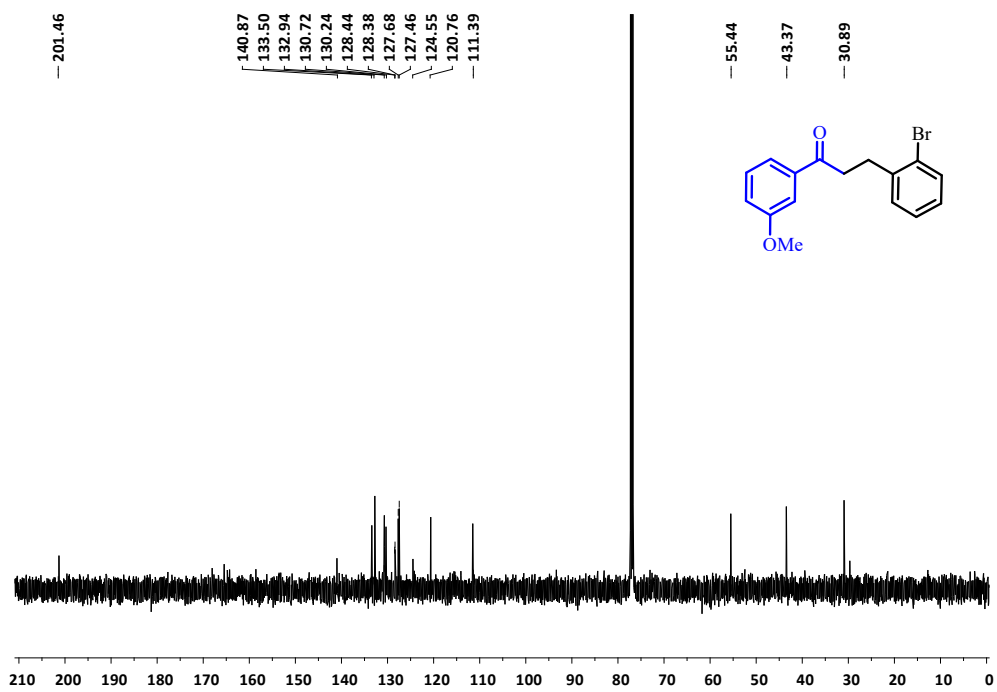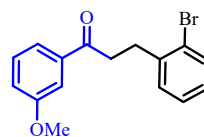

Figure s28.  $^{13}\text{C}\{^1\text{H}\}$  NMR spectrum of 3ca.

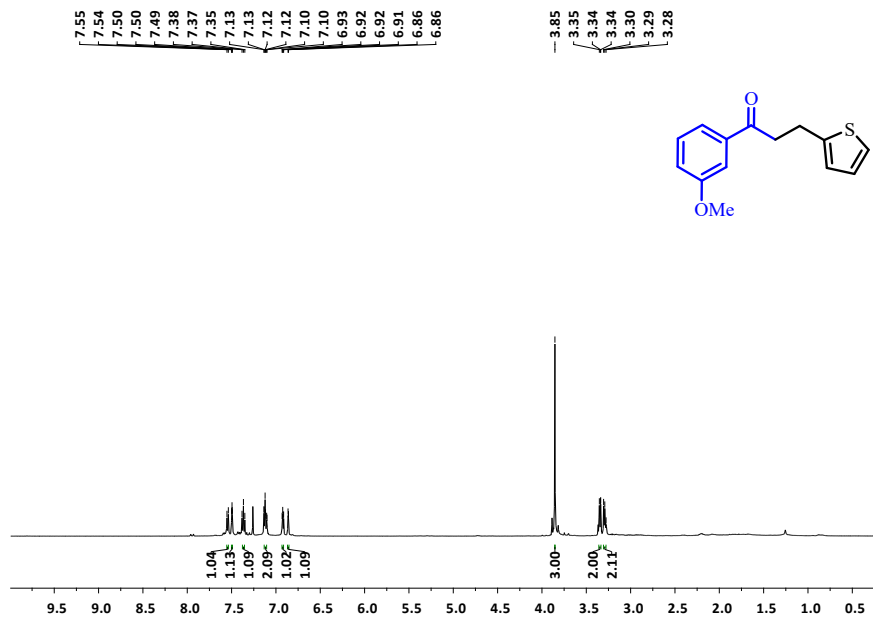

Figure s29.  $^1\text{H}$  NMR spectrum of 3cf.

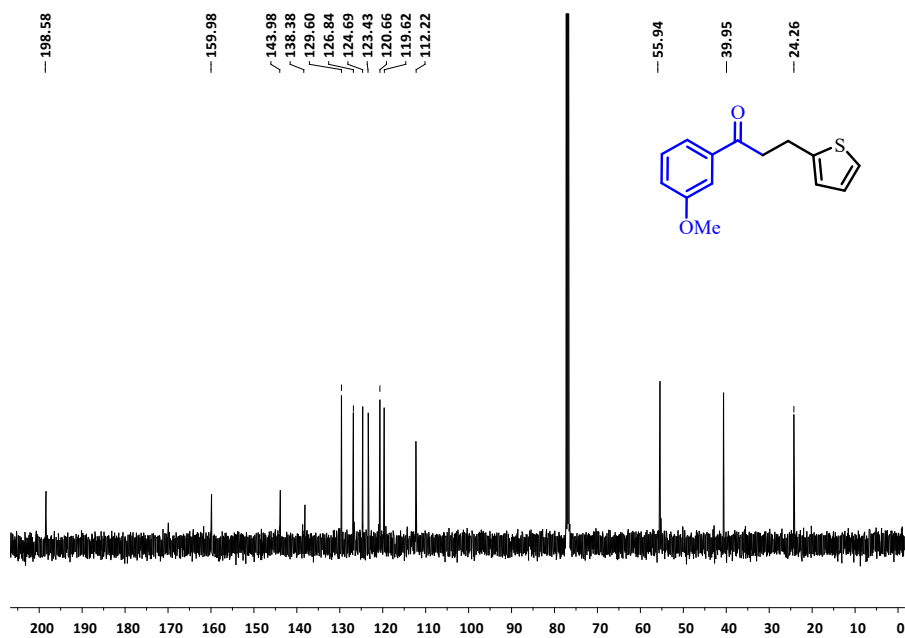

Figure s30.  $^{13}\text{C}\{^1\text{H}\}$  NMR spectrum of 3cf.

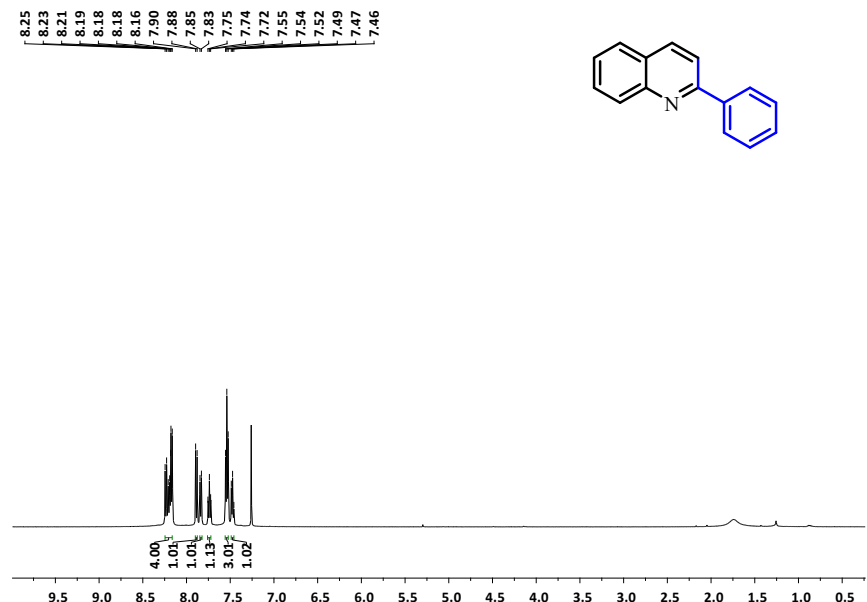

Figure s31.  $^1\text{H}$  NMR spectrum of 6aa.

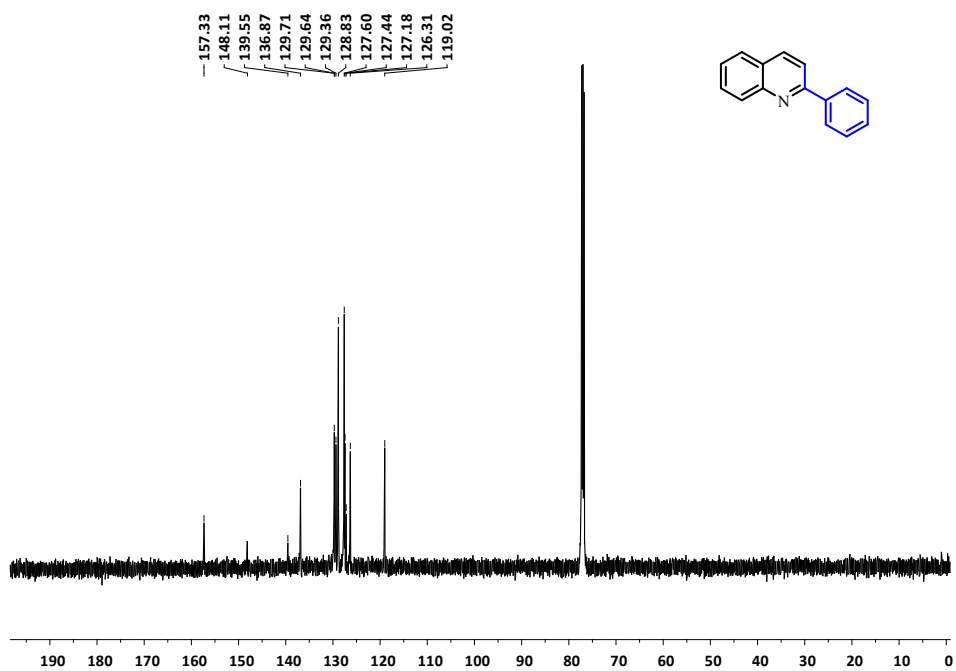

Figure s32.  $^{13}\text{C}\{^1\text{H}\}$  NMR spectrum of 6aa.



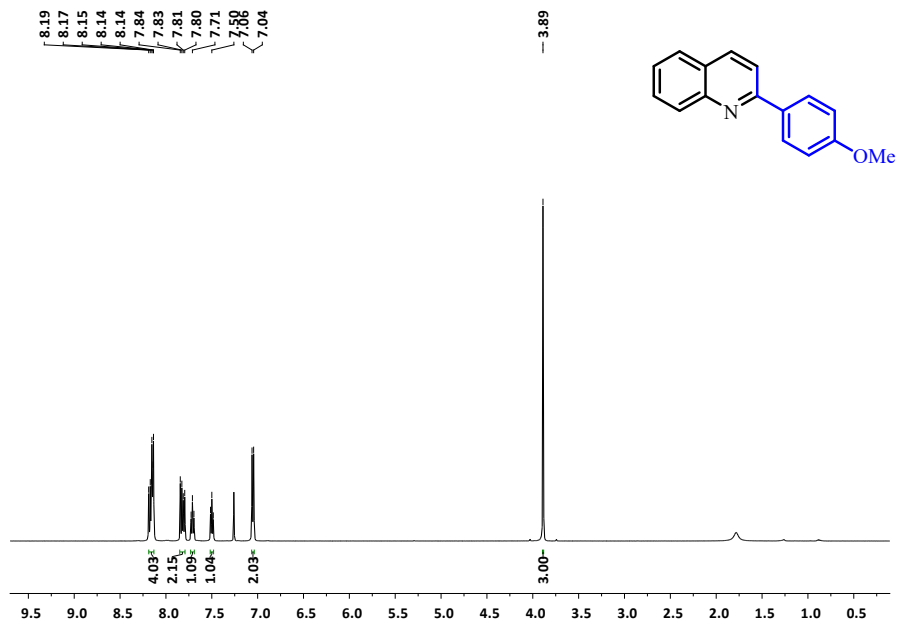

Figure s33.  $^1\text{H}$  NMR spectrum of **6ba**.

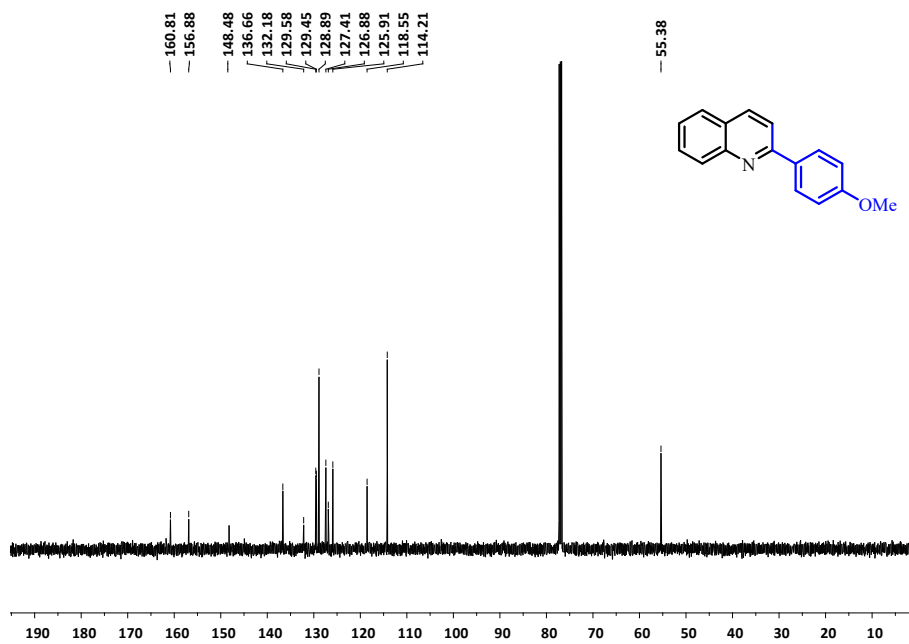

Figure s34.  $^{13}\text{C}\{^1\text{H}\}$  NMR spectrum of **6ba**.

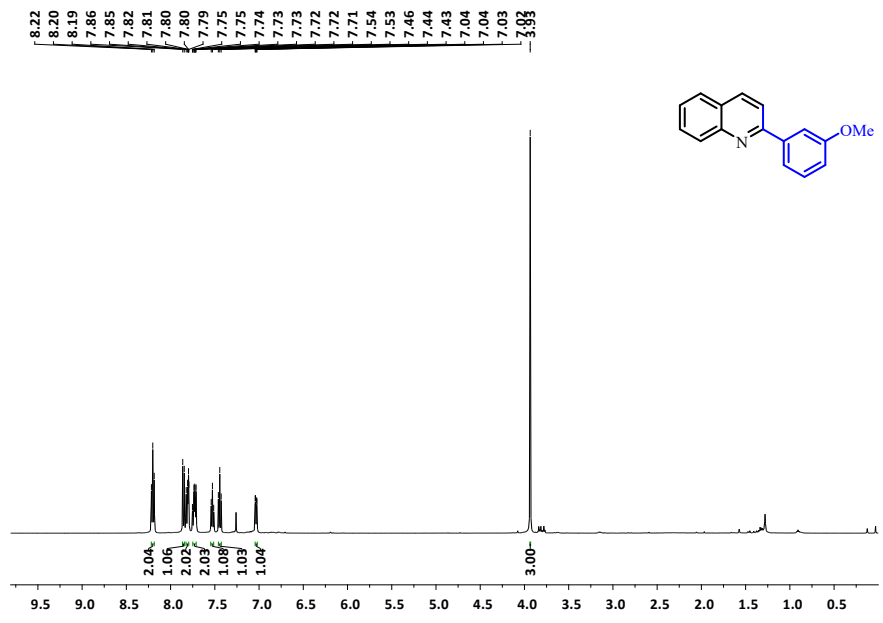

Figure s35.  $^1\text{H}$  NMR spectrum of 6ca.

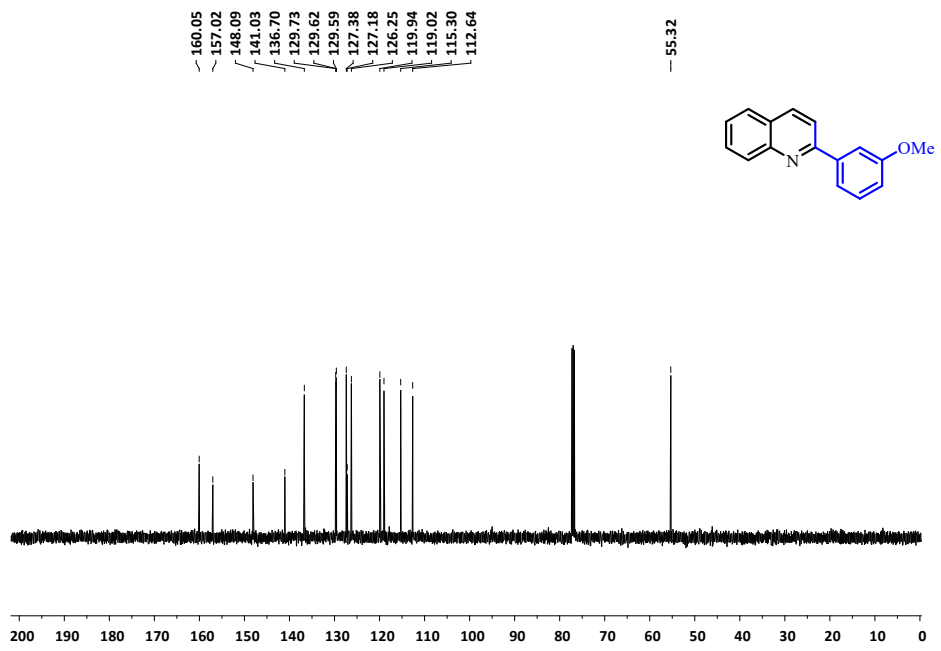

Figure s36.  $^{13}\text{C}\{^1\text{H}\}$  NMR spectrum of 6ca.

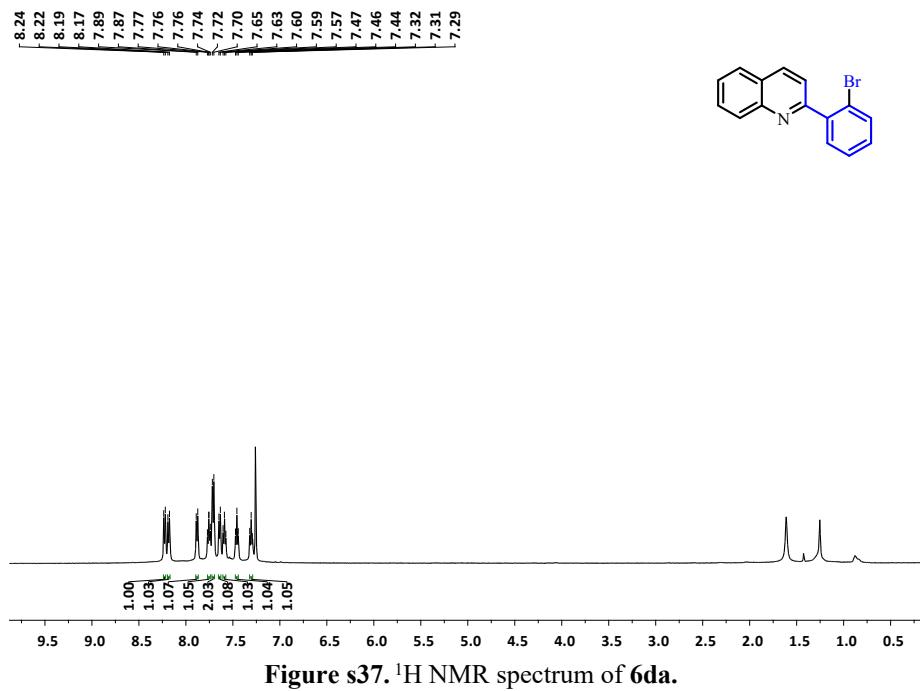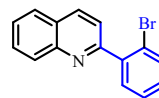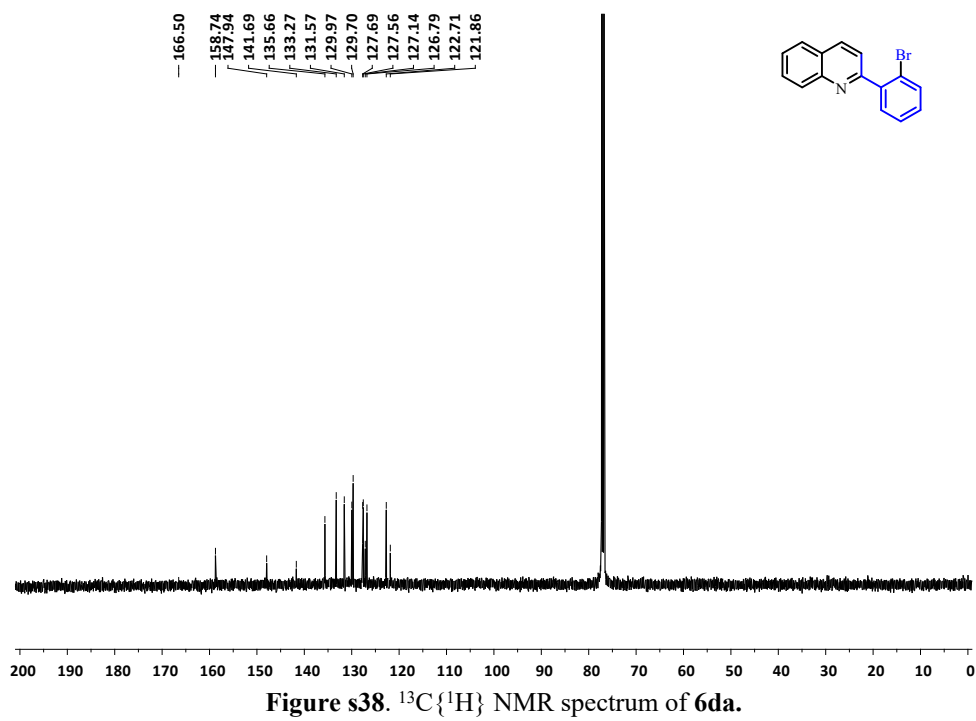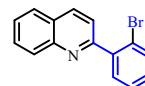

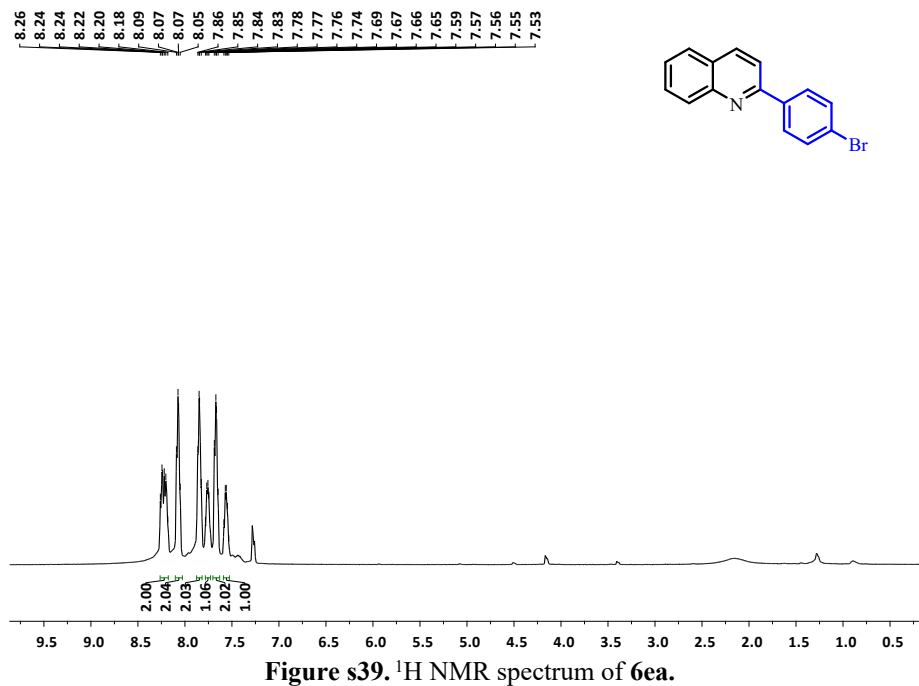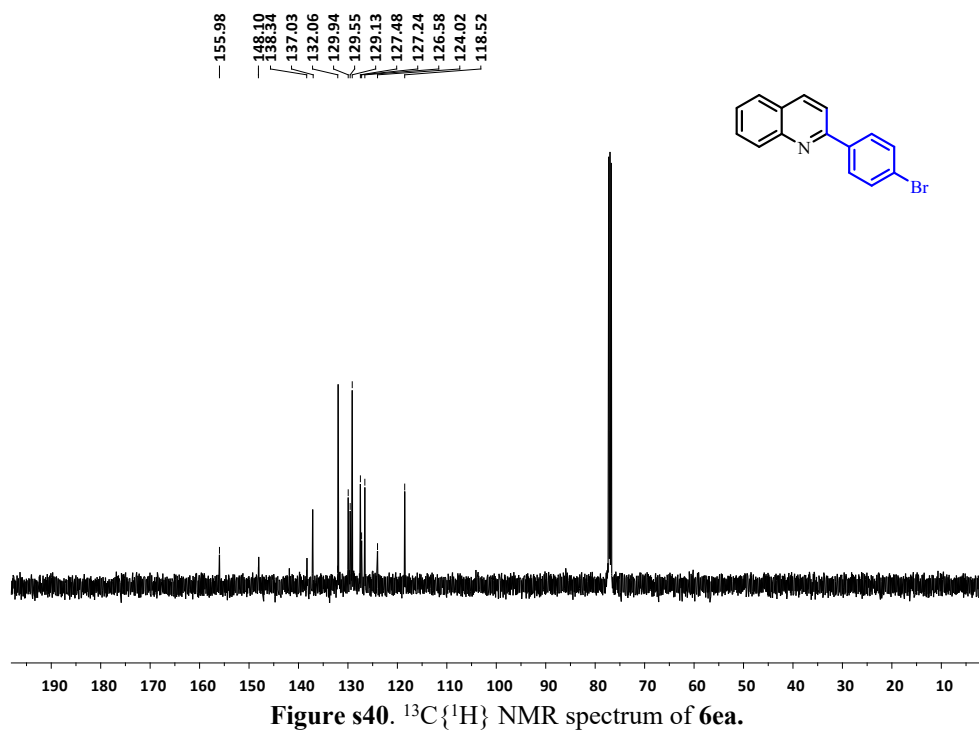

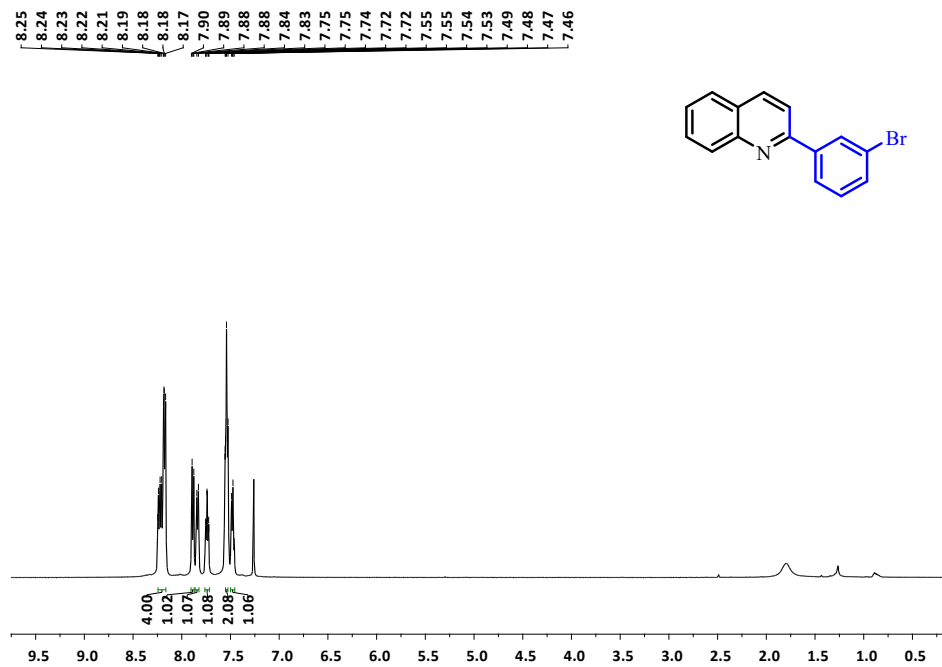

Figure s41.  $^1\text{H}$  NMR spectrum of 6fa.

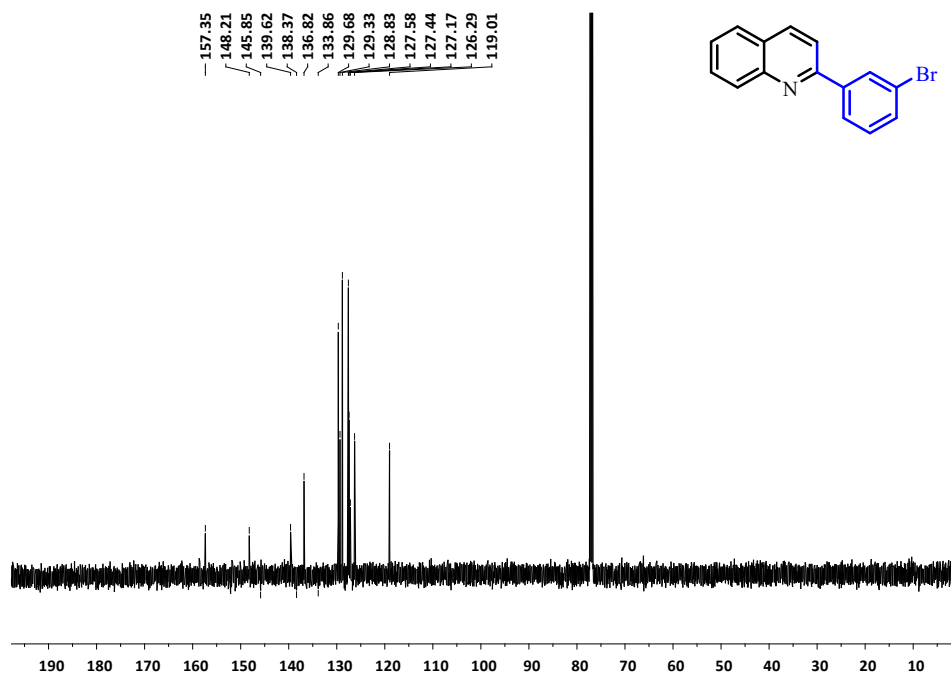

Figure s42.  $^{13}\text{C}\{^1\text{H}\}$  NMR spectrum of 6fa.

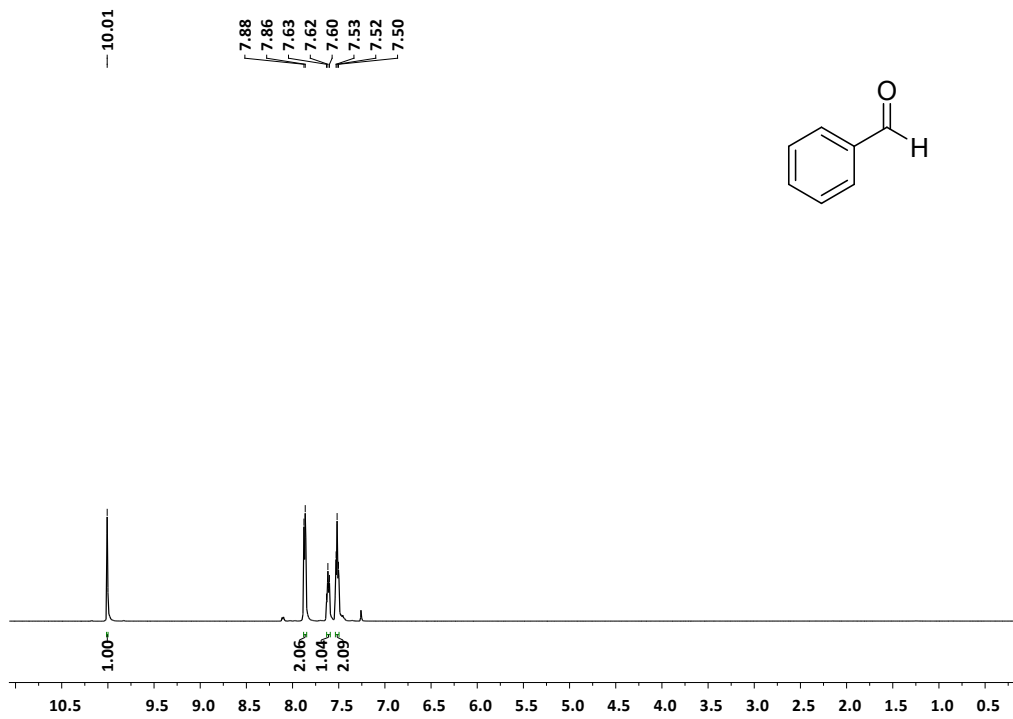

Figure s43.  $^1\text{H}$  NMR spectrum of  $2a'$ .

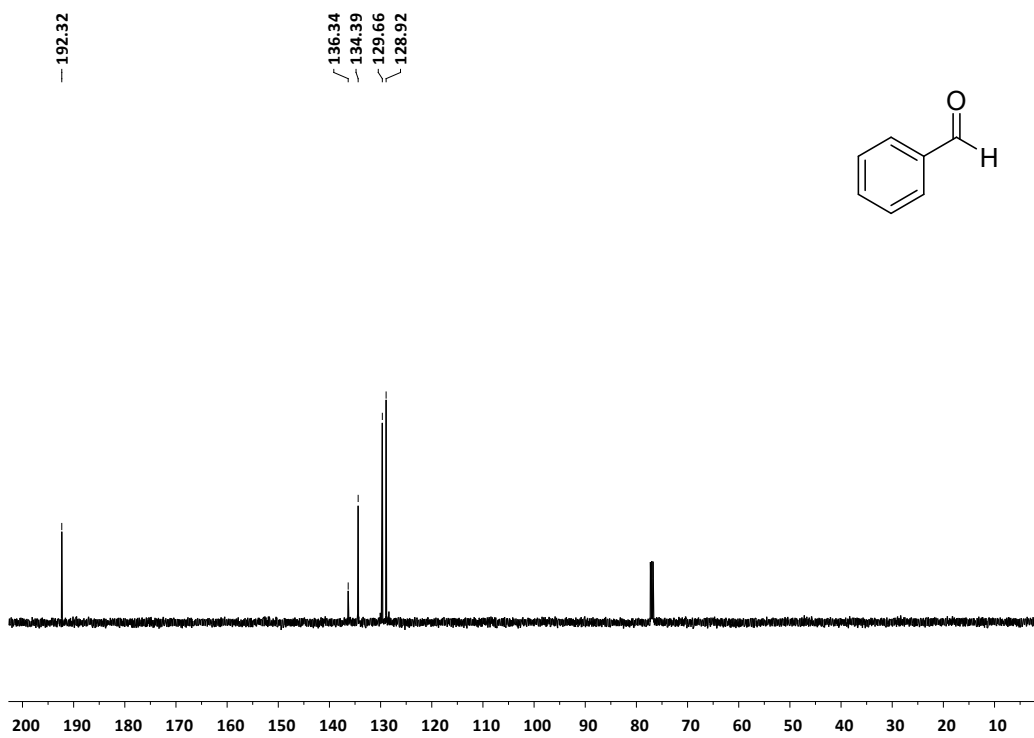

Figure s44.  $^{13}\text{C}\{^1\text{H}\}$  NMR spectrum of  $2a'$ .

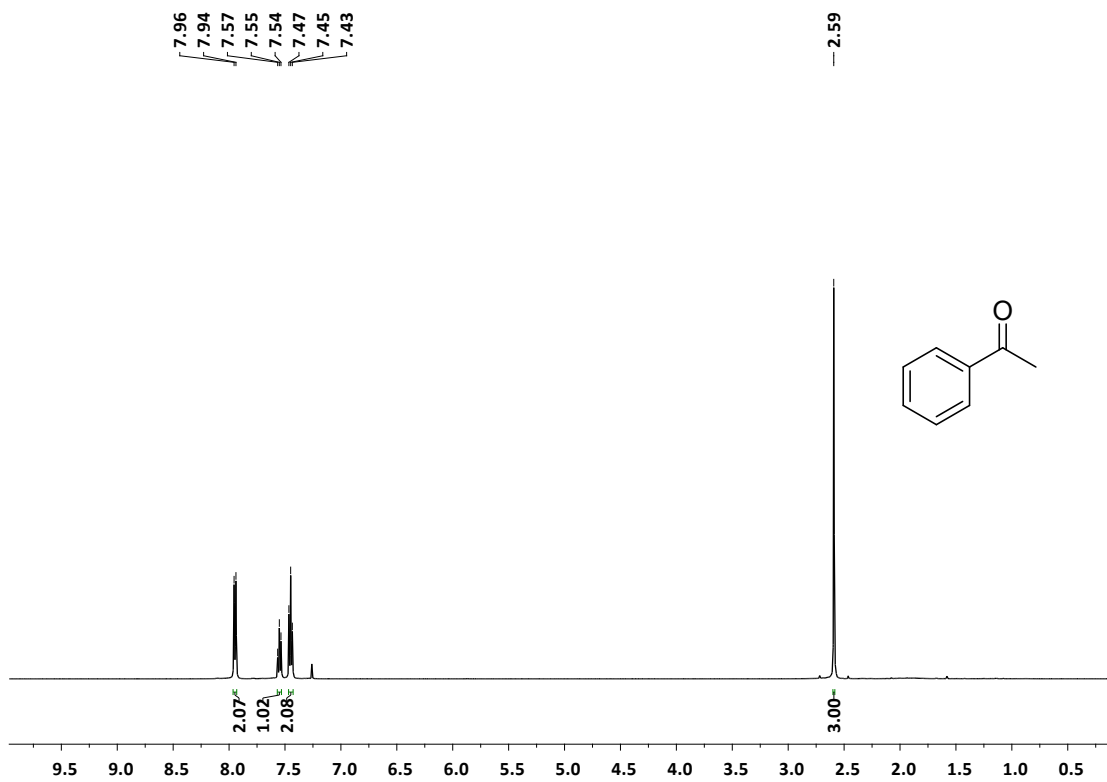

Figure s45. <sup>1</sup>H NMR spectrum of 1a.

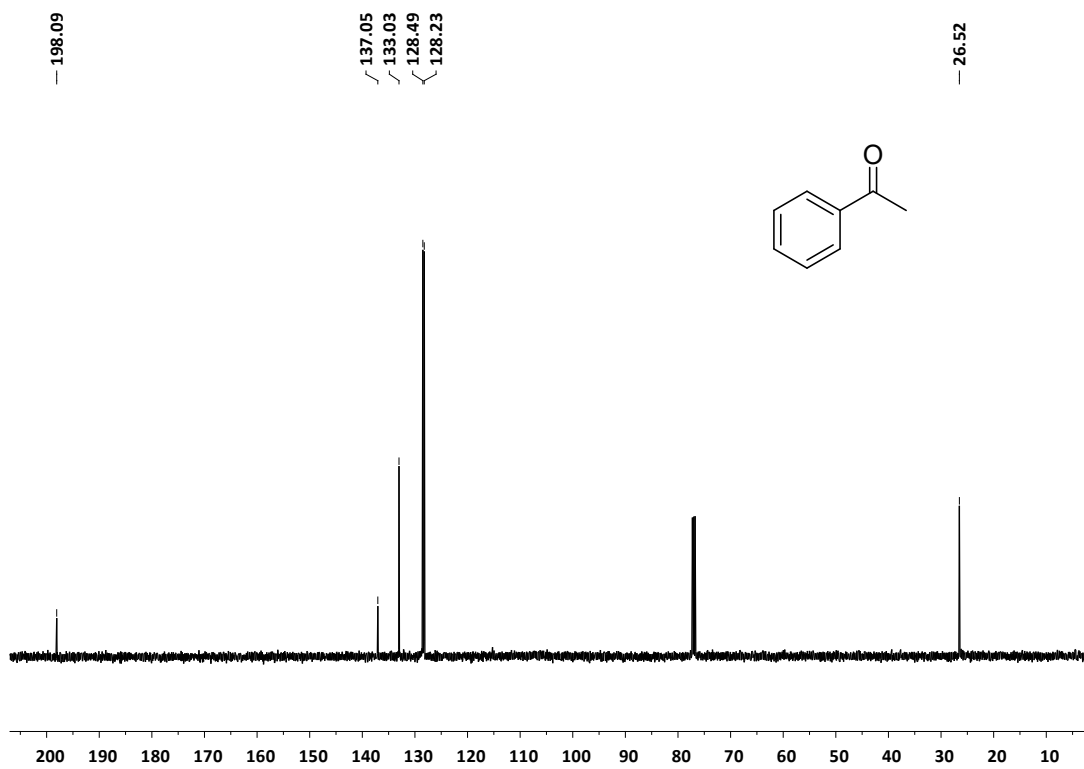

Figure s46. <sup>13</sup>C{<sup>1</sup>H} NMR spectrum of 1a.

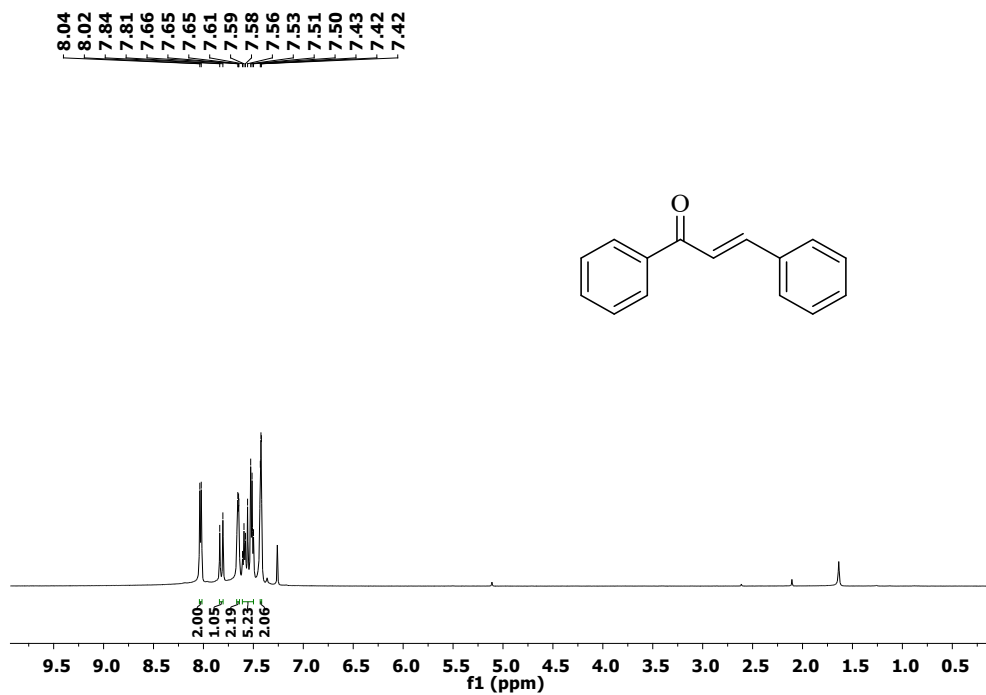

Figure s47. <sup>1</sup>H NMR spectrum of 3aa'.

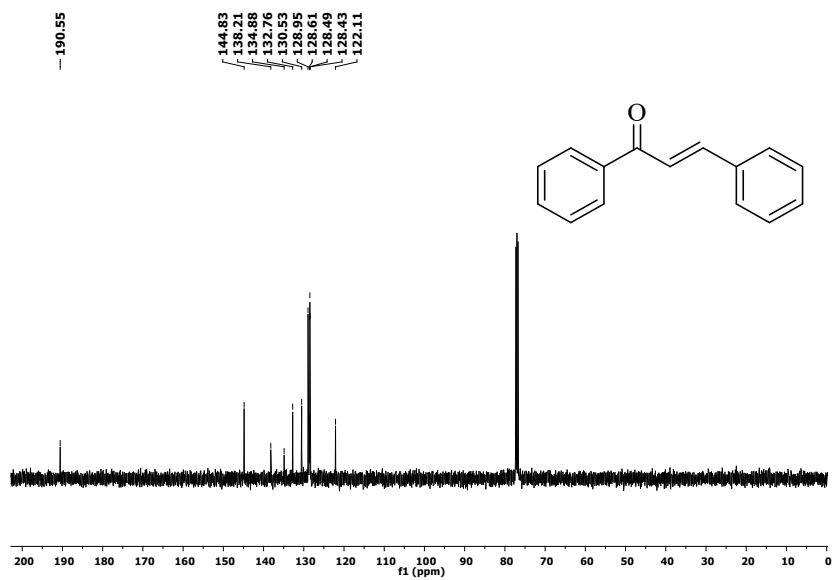

Figure s48. <sup>13</sup>C{<sup>1</sup>H} NMR spectrum of 3aa'.



Compound Spectra

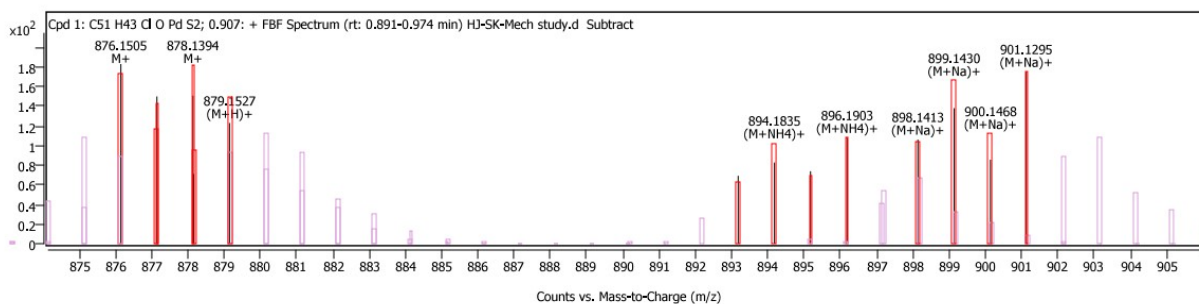

**Figure s49.** HRMS spectrum of intermediate **A** showing HRMS (ESI) m/z caclcd for C<sub>51</sub>H<sub>43</sub>ClOPdS<sub>2</sub> [M]<sup>+</sup> 876.1479, found 876.1505.

Compound Spectra

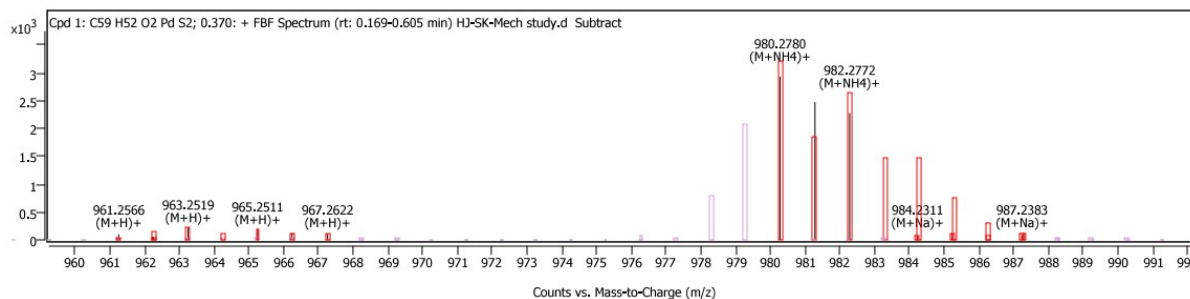

**Figure s50.** HRMS spectrum of intermediate **B** showing HRMS (ESI) m/z caclcd for C<sub>59</sub>H<sub>52</sub>O<sub>2</sub>PdS<sub>2</sub> [M+H]<sup>+</sup> 963.2522, found 963.2519.

Compound Spectra

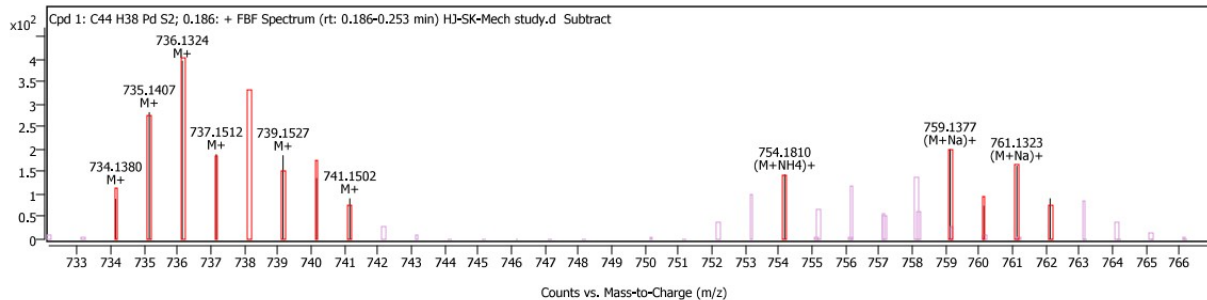

**Figure s51.** HRMS spectrum of intermediate **C** showing HRMS (ESI) m/z caclcd for C<sub>59</sub>H<sub>52</sub>O<sub>2</sub>PdS<sub>2</sub> [M+Na]<sup>+</sup> 759.1347, found 759.1377.

Compound Spectra

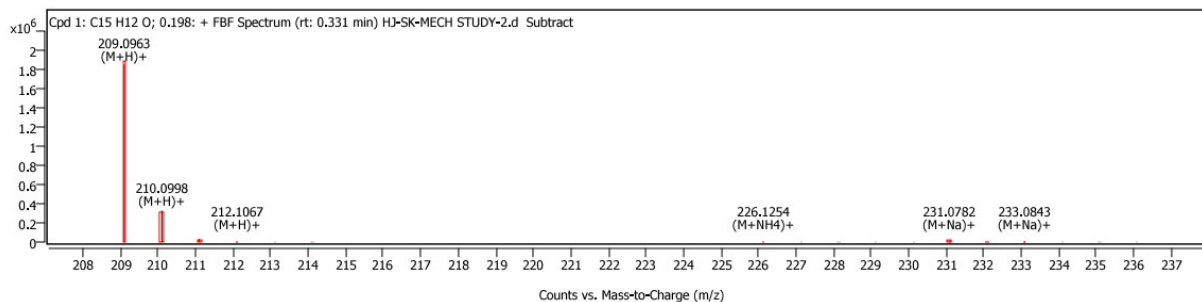

**Figure s52.** HRMS spectrum of intermediate **3aa'** showing HRMS (ESI) m/z caclcd for C<sub>15</sub>H<sub>12</sub>O [M+H]<sup>+</sup> 209.0966, found 209.0963.

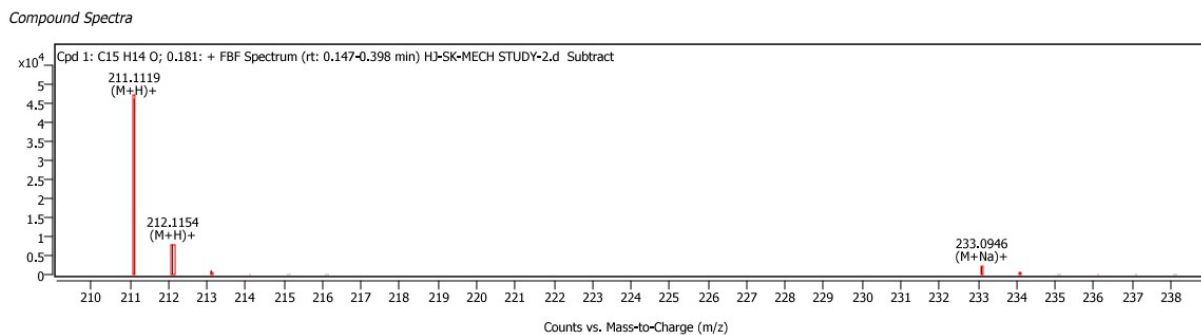

**Figure s53.** HRMS spectrum of product **3aa** showing HRMS (ESI) m/z caclcd for C<sub>15</sub>H<sub>14</sub>O [M+H]<sup>+</sup> 211.1123, found 211.1119.

## REFERENCES

- s1. Apex3 v2017.3-0, Saint V8.38A, and SAINT V8.38A. Bruker AXS Inc.: Madison, WI, USA, **2018**.
- s2. O. V. Dolomanov, L. J. Bourhis, R. J. Gildea, J. A. K. Howard and H. Puschmann, *J. Appl. Cryst.*, **2009**, *42*, 339-341.
- s3. (a) G. M. Sheldrick, *Acta Crystallogr. Sect. C: Struct. Chem.* **2015**, *71*, 3–8. (b) G. M. Sheldrick, *Acta Cryst.*, **2015**, *A71*, 3-8.
- s4. Bruker Analytical X-ray Systems, *Software for the Integration of CCD Detector System*, Bruker AXS, Madison, WI, after **2013**.
- s5. S. P. Kavin and R. Ramesh, *Dalton Trans.*, 2023, **52**, 10038-10044.
- s6. N. R. Bennedsen, R. L. Mortensen, S. Kramer and S. Kegnæs, *J. Catal.*, 2019, **371**, 153-160.
- s7. K. Yu, Q. Chen and W. Liu, *Org. Chem. Front.*, 2022, **9**, 6573-6578..
- s8. H. Vander Mierde, N. Ledoux, B. Allaert, P. Van Der Voort, R. Drozdak, D. De Vos and F. Verpoort, *New J. Chem.*, 2007, **31**, 1572-1574.
